# Supplementary material for: Novel hydroxytyrosol esters as potential anti-amyloid and neuroprotective agents for Alzheimer's disease
Source: Royal Society of Chemistry journal article supplement (doi:10.1039/d6md00265j), 2026-06-04
Supplement: d6md00265j1.pdf [file d6md00265j1.pdf]

## Supplementary Information

### Novel Hydroxytyrosol Esters as Potential Anti-Amyloid and Neuroprotective Agents for Alzheimer's Disease

Ioanna Kalpaktsi<sup>1</sup>, Anthi Panara<sup>2</sup>, Barbara Mavroidi<sup>3</sup>, Giorgos Garcia Niforos<sup>4</sup>, Amalia D. Kalampaliki<sup>1</sup>, Ioanna C. Vlachogianni<sup>5</sup>, Eleftheria A. Georgiou,<sup>1</sup> Elizabeth Fragopoulou<sup>5</sup>, Anthony Tsarbopoulos<sup>6</sup>, Alexios-Leandros Skaltsounis<sup>7</sup>, Maria Pelecanou<sup>8</sup>, Kontantinos Palikaras<sup>4</sup>, Evangelos Gikas<sup>2</sup>, Ioannis K. Kostakis<sup>1,\*</sup>

<sup>1</sup>Division of Pharmaceutical Chemistry, Department of Pharmacy, National and Kapodistrian University of Athens, Panepistimiopolis Zografou 15771, Athens, Greece

<sup>2</sup>Laboratory of Analytical Chemistry, Department of Chemistry, National and Kapodistrian University of Athens, Panepistimiopolis, Zografou, Athens 15771, Greece.

<sup>3</sup>Institute of Biosciences & Applications, National Centre for Scientific Research "Demokritos", 15310 Athens, Greece

<sup>4</sup>Department of Physiology, Medical School, National and Kapodistrian University of Athens, Athens 11527, Athens, Greece

<sup>5</sup>Department of Nutrition & Dietetics, School of Health Sciences and Education, Harokopio University, Athens, Greece

<sup>6</sup>Department of Pharmacology, Medical School, National and Kapodistrian University of Athens, 11527 Athens, Greece

<sup>7</sup>Division of Pharmacognosy and Natural Products Chemistry, Department of Pharmacy, National and Kapodistrian University of Athens, Panepistimiopolis Zografou 15771, Athens, Greece

\* Corresponding author.

E-mail address: [ikkostakis@pharm.uoa.gr](mailto:ikkostakis@pharm.uoa.gr) (IKK).

# Contents

|                          |    |
|--------------------------|----|
| <b>NMR Spectra</b> ..... | 3  |
| <b>Figures</b> .....     | 31 |
| <b>Tables</b> .....      | 35 |

# NMR Spectra

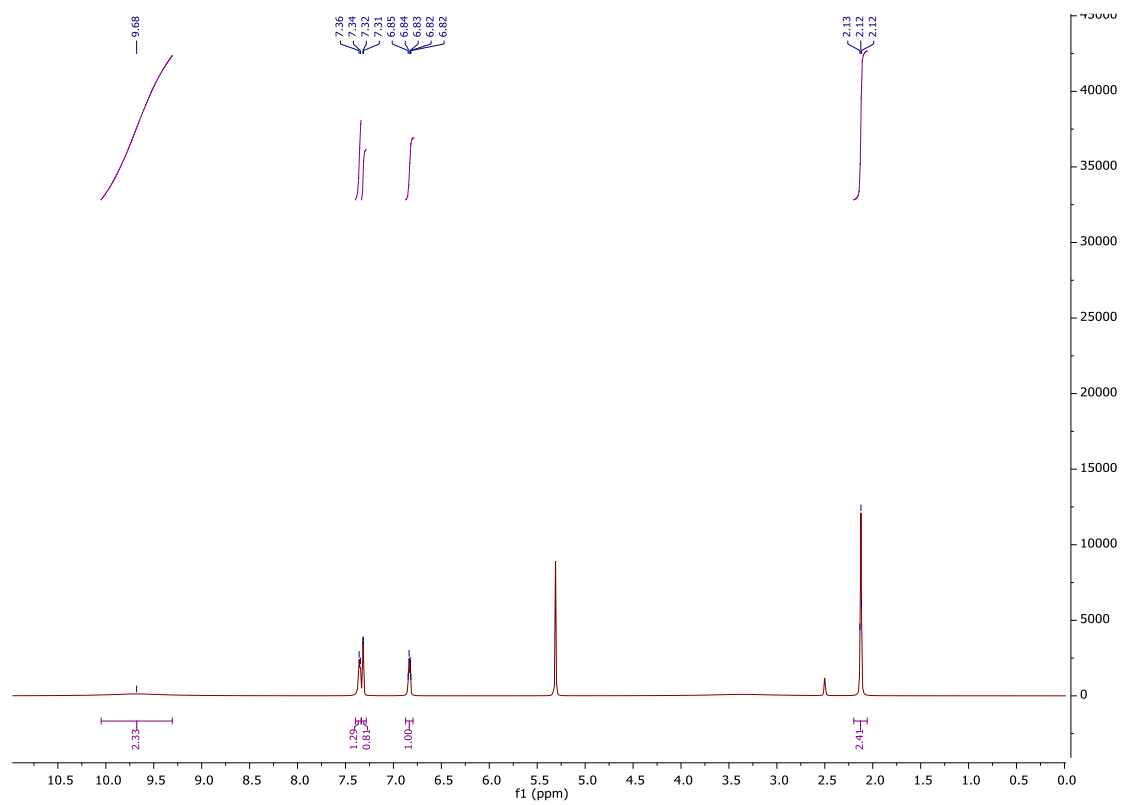

<sup>1</sup>H NMR spectrum of 3a.

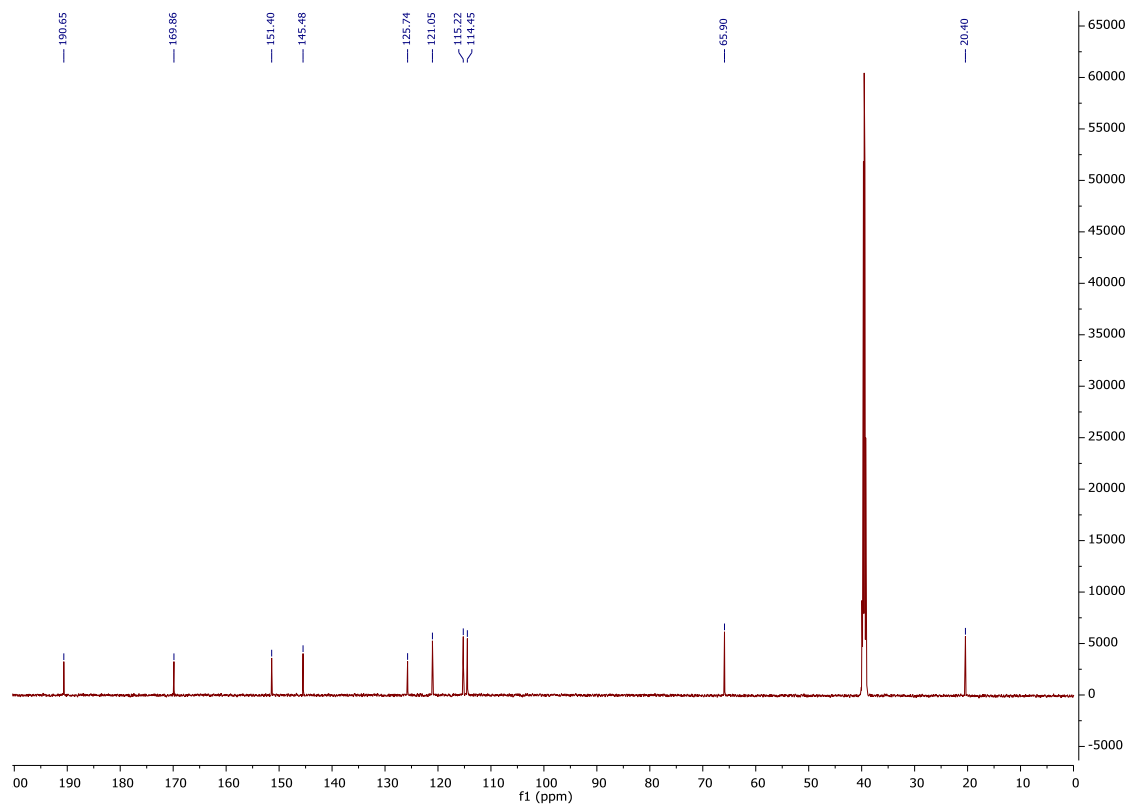

<sup>13</sup>C NMR spectrum of 3a.

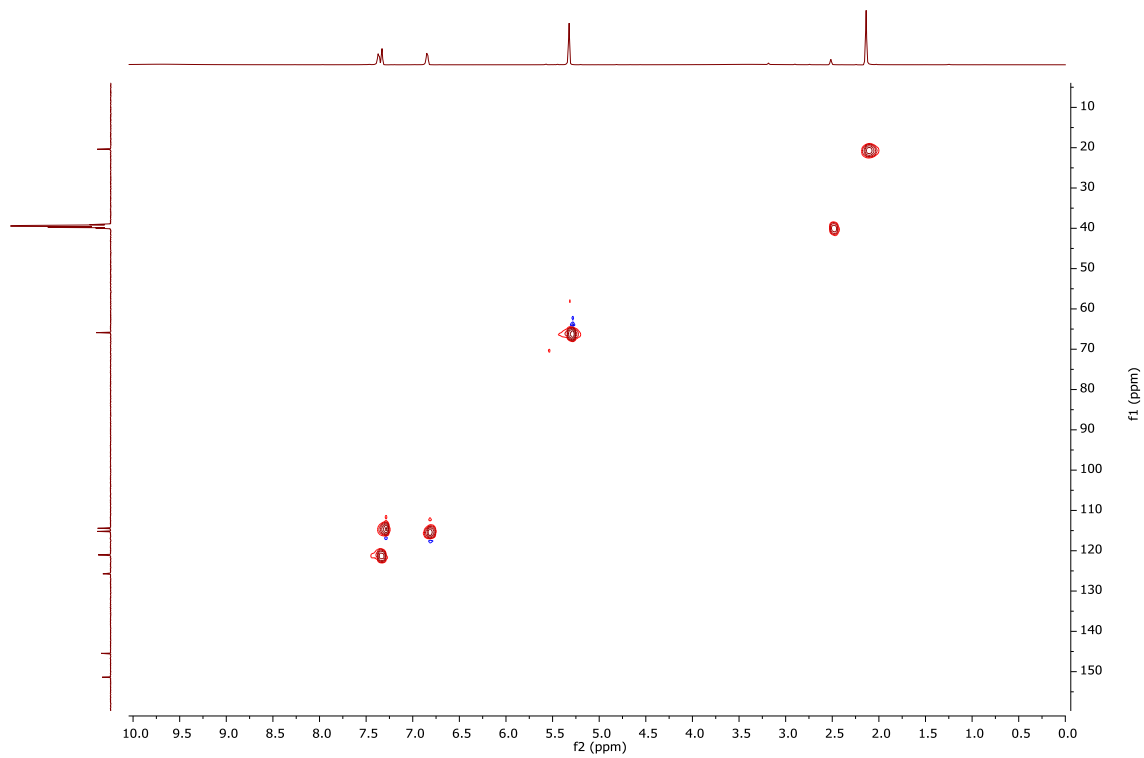

HSQC spectrum of **3a**.

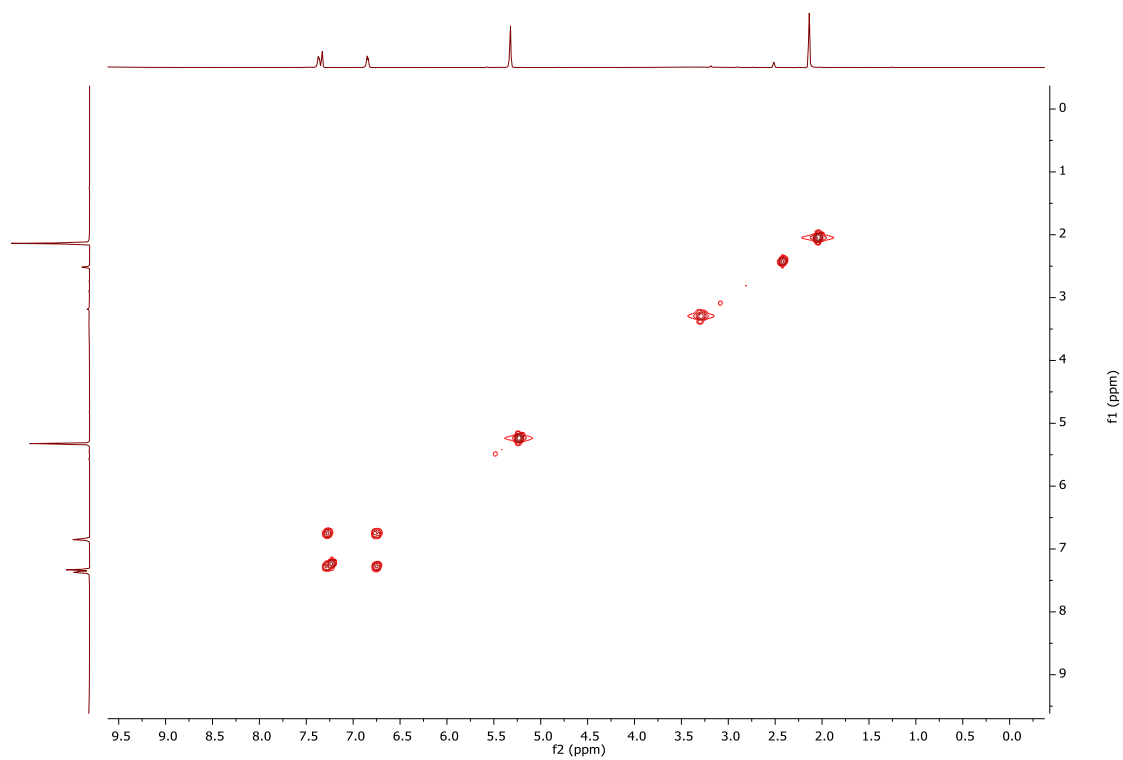

COSY spectrum of **3a**.

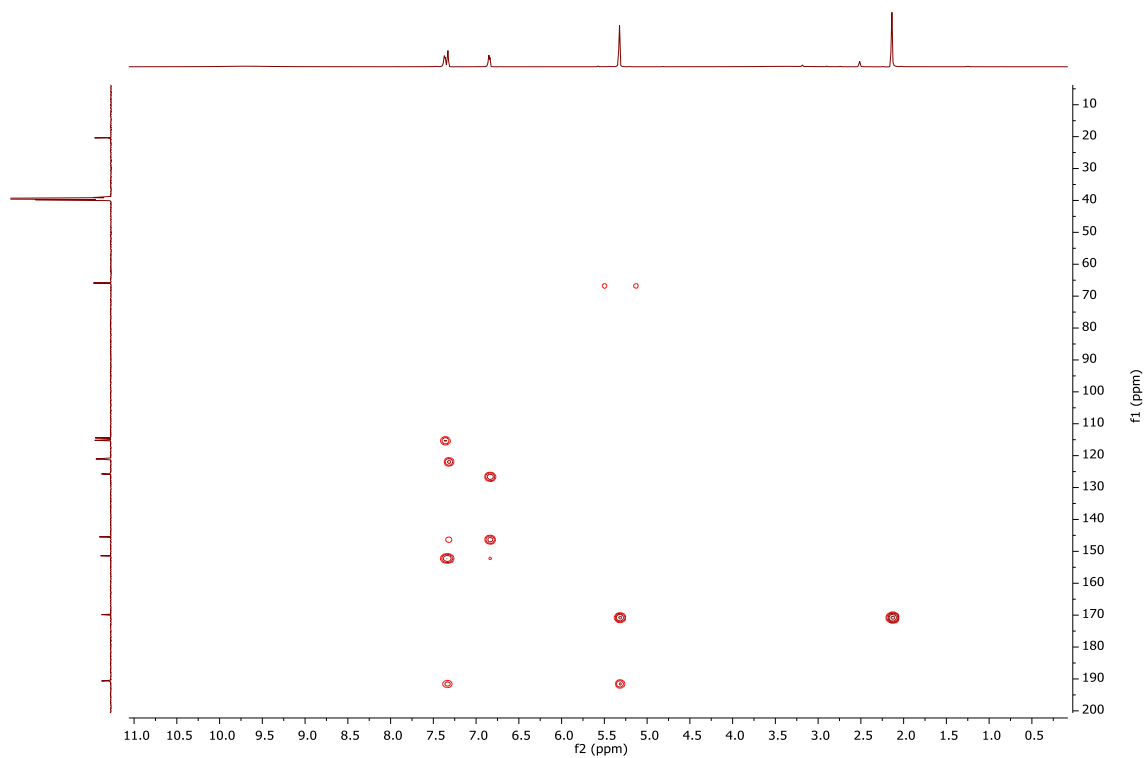

HMBC spectrum of **3a**.

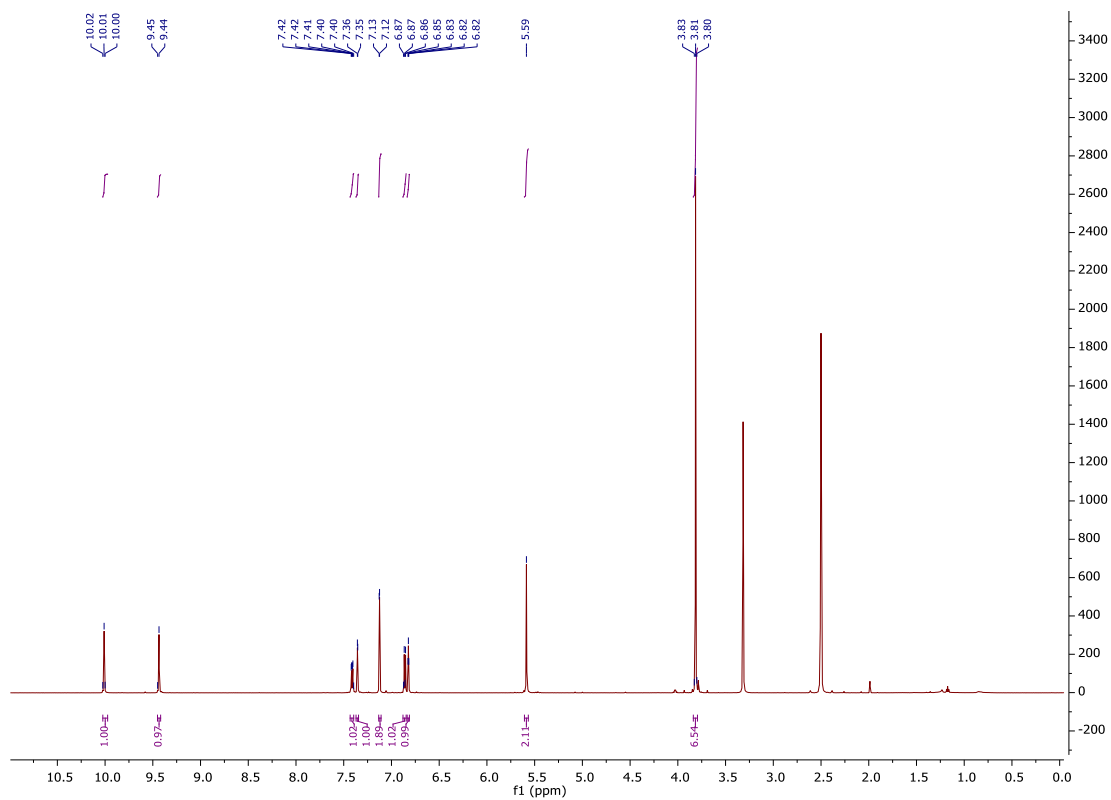

$^1\text{H}$   $^1\text{H}$  NMR spectrum of **3b**.

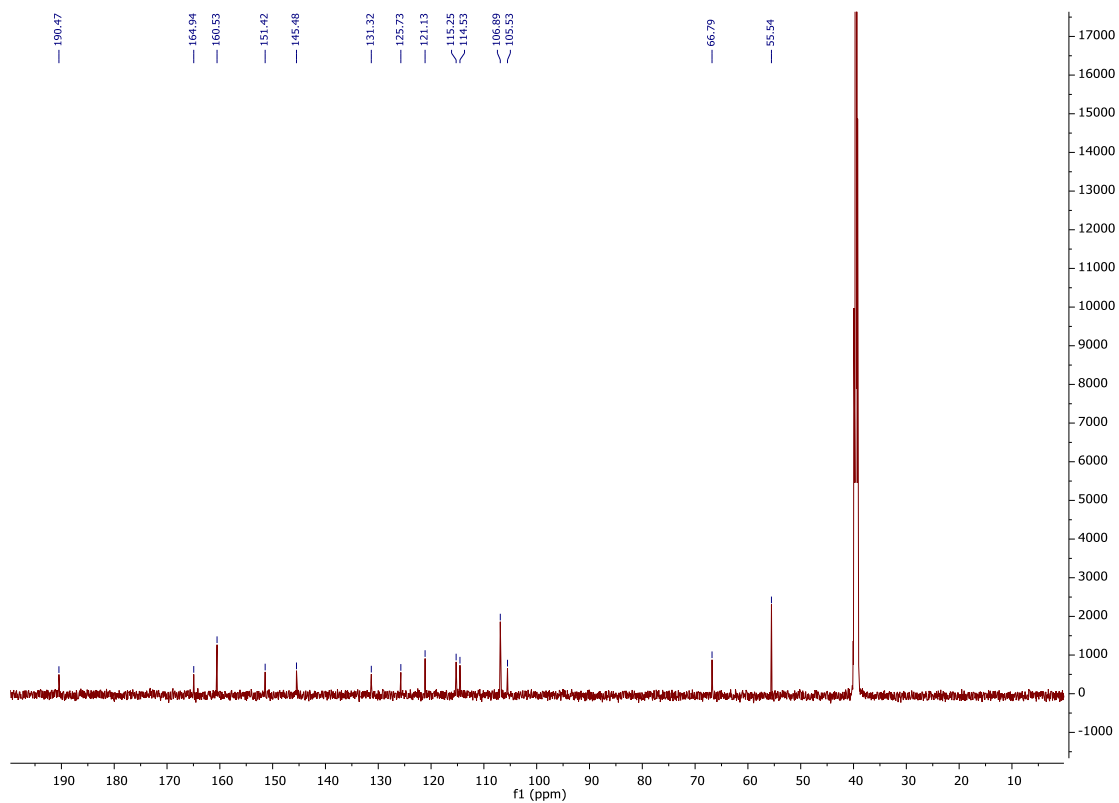

<sup>13</sup>C NMR spectrum of **3b0**

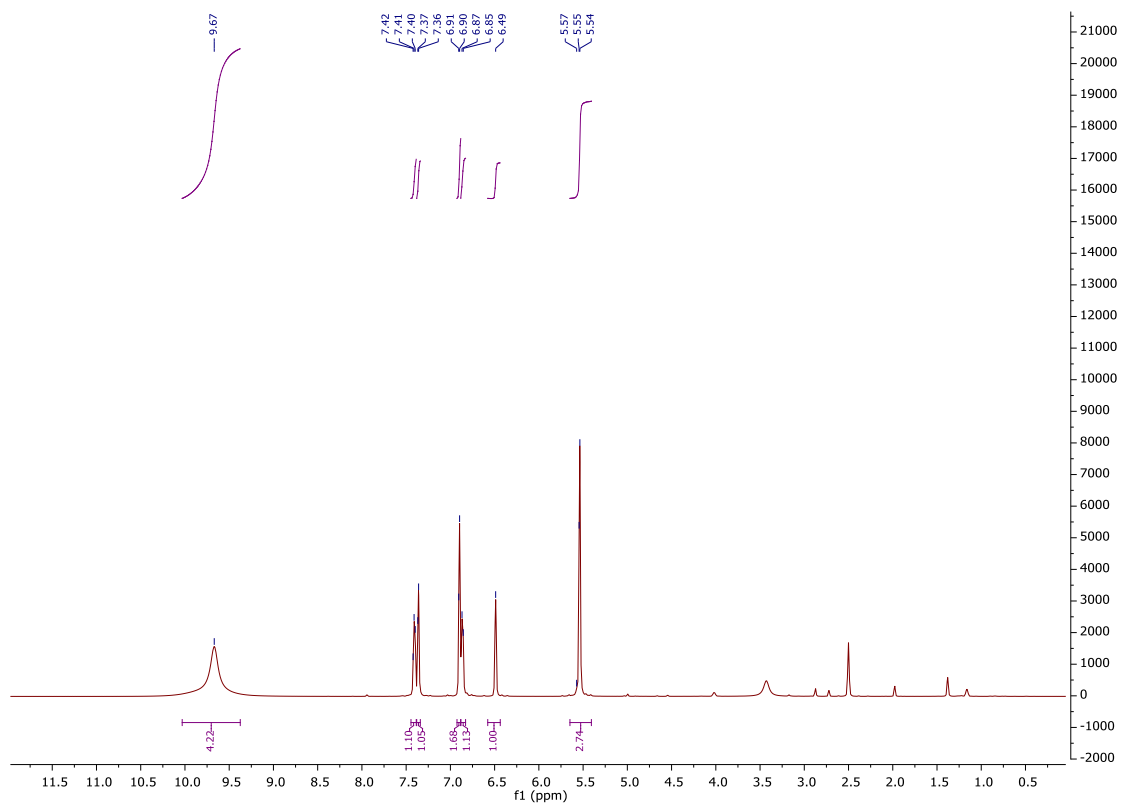

<sup>1</sup>H NMR spectrum of **3c**

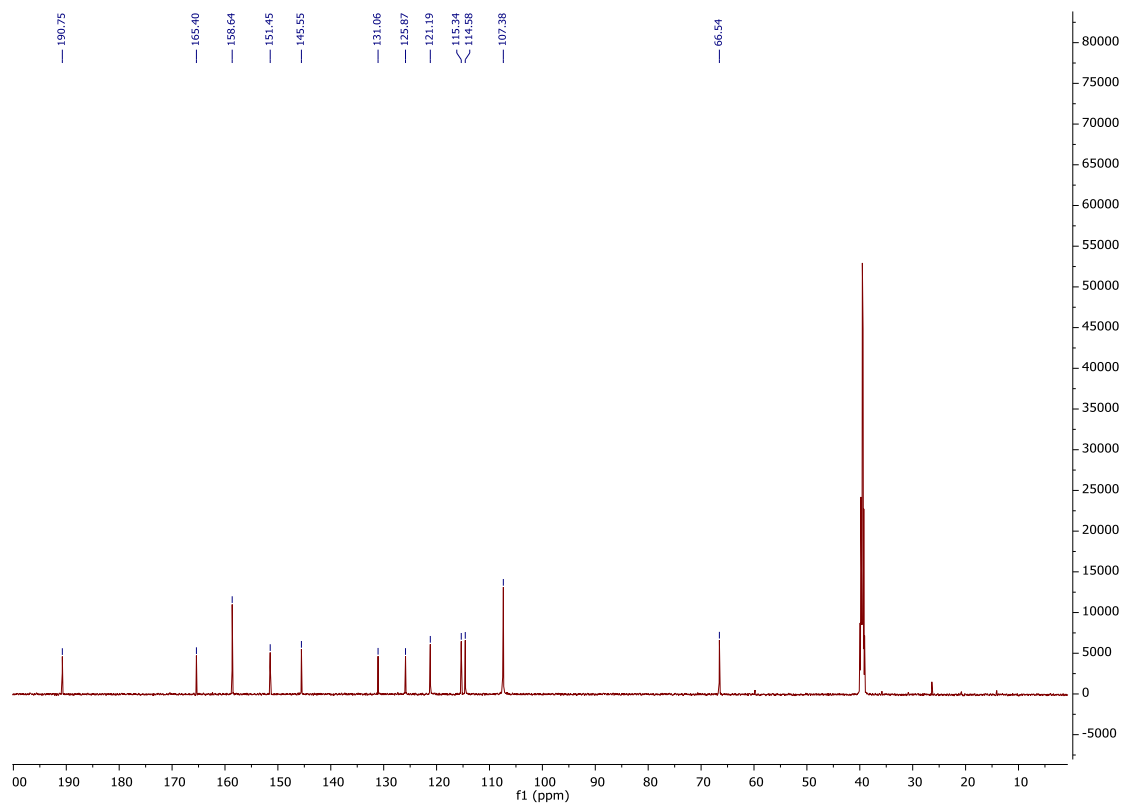

$^{13}\text{C}$  NMR spectrum of **3c**.

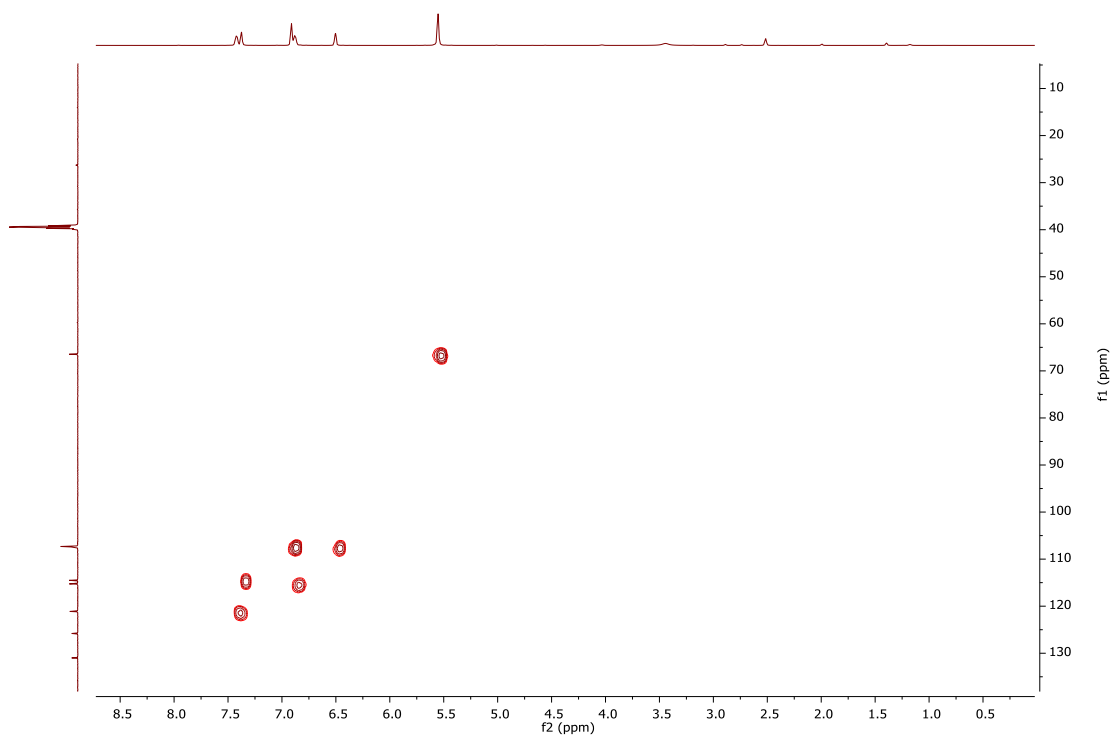

HSQC spectrum of **3c**.

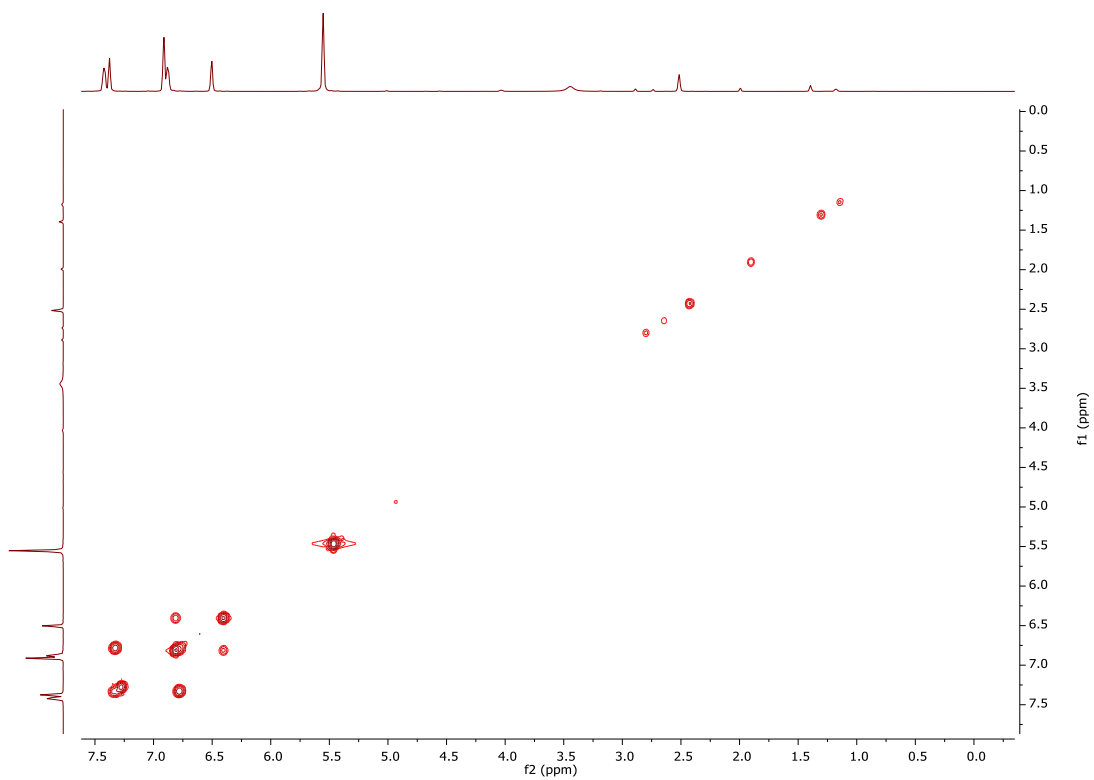

COSY spectrum of **3c**.

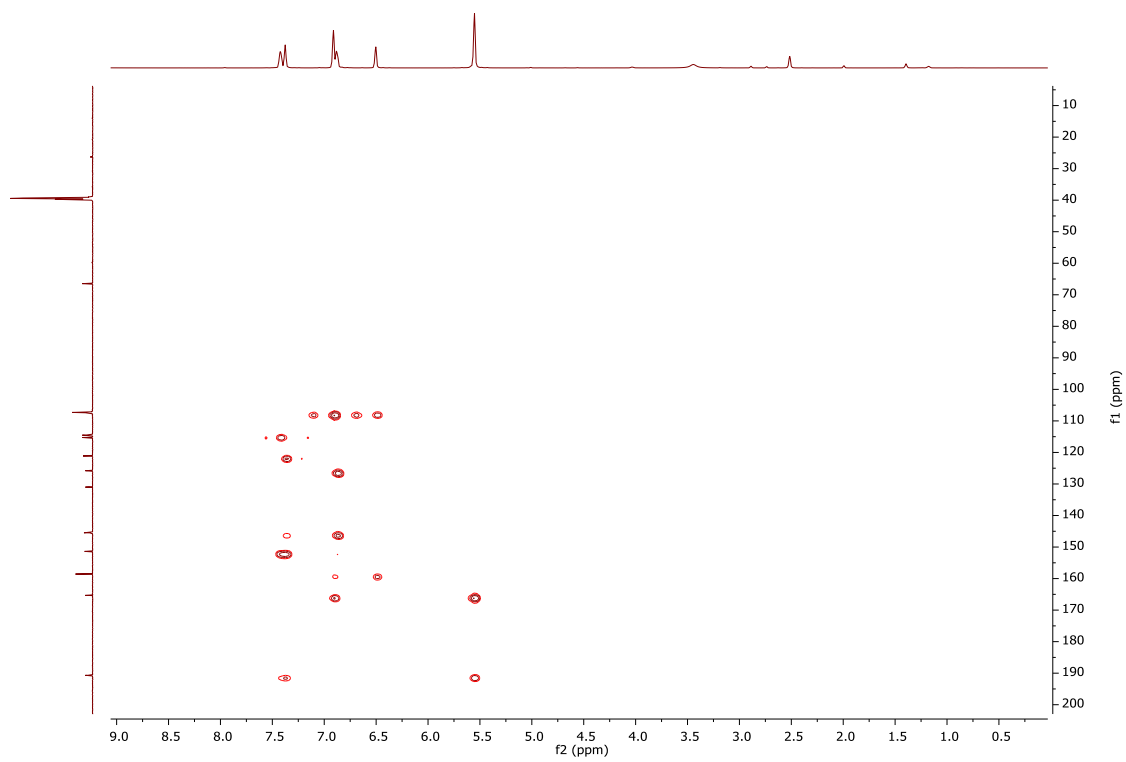

HMBC spectrum of **3c**.

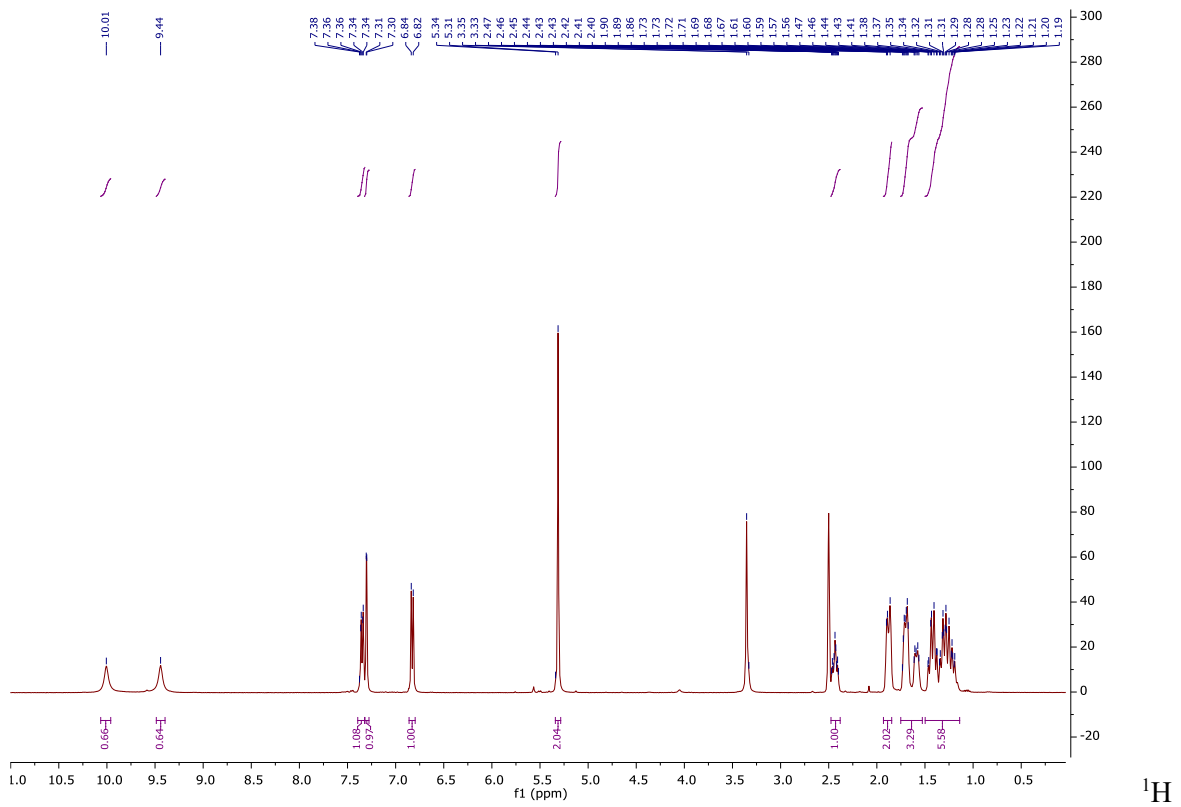

NMR spectrum of 3d

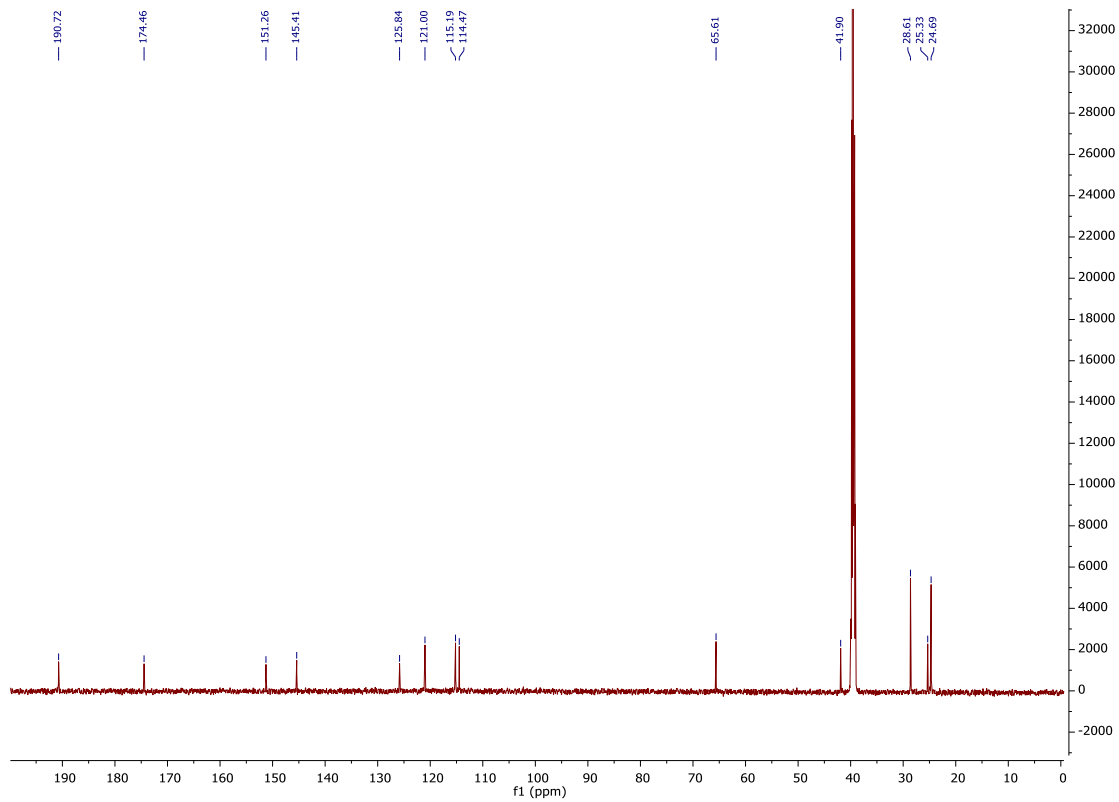

<sup>13</sup>C NMR spectrum of 3d

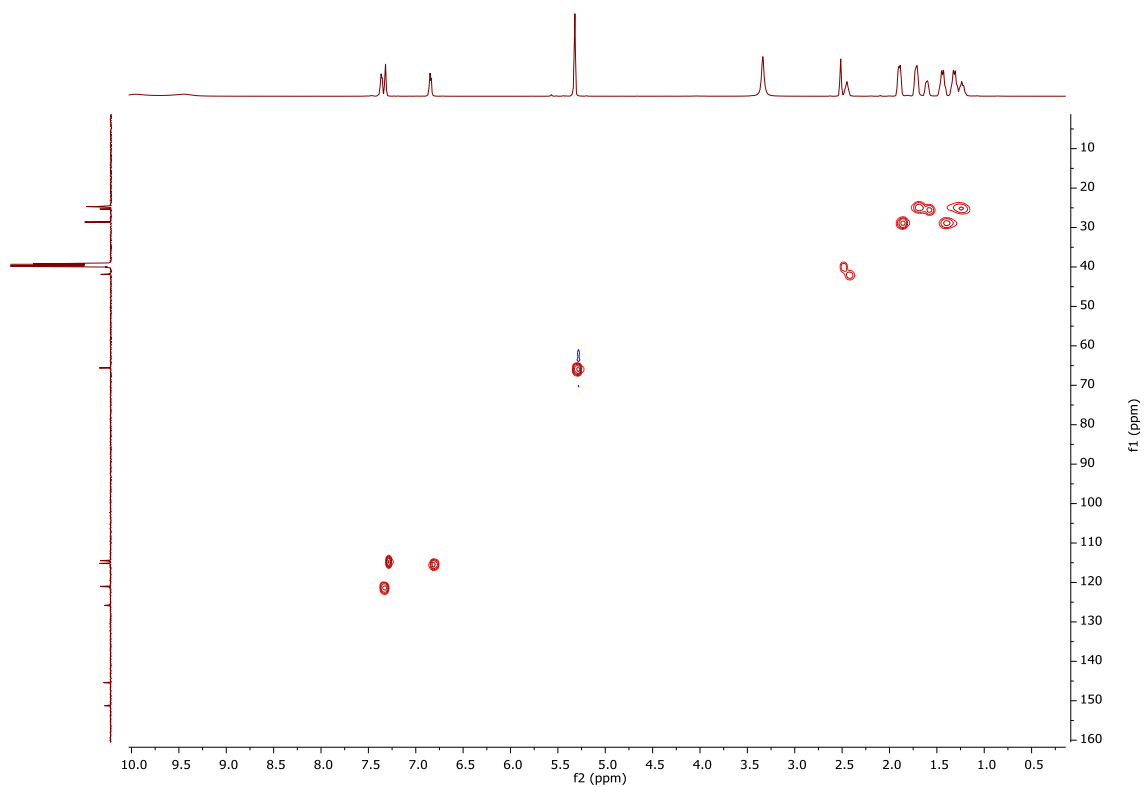

HSQC spectrum of 3d

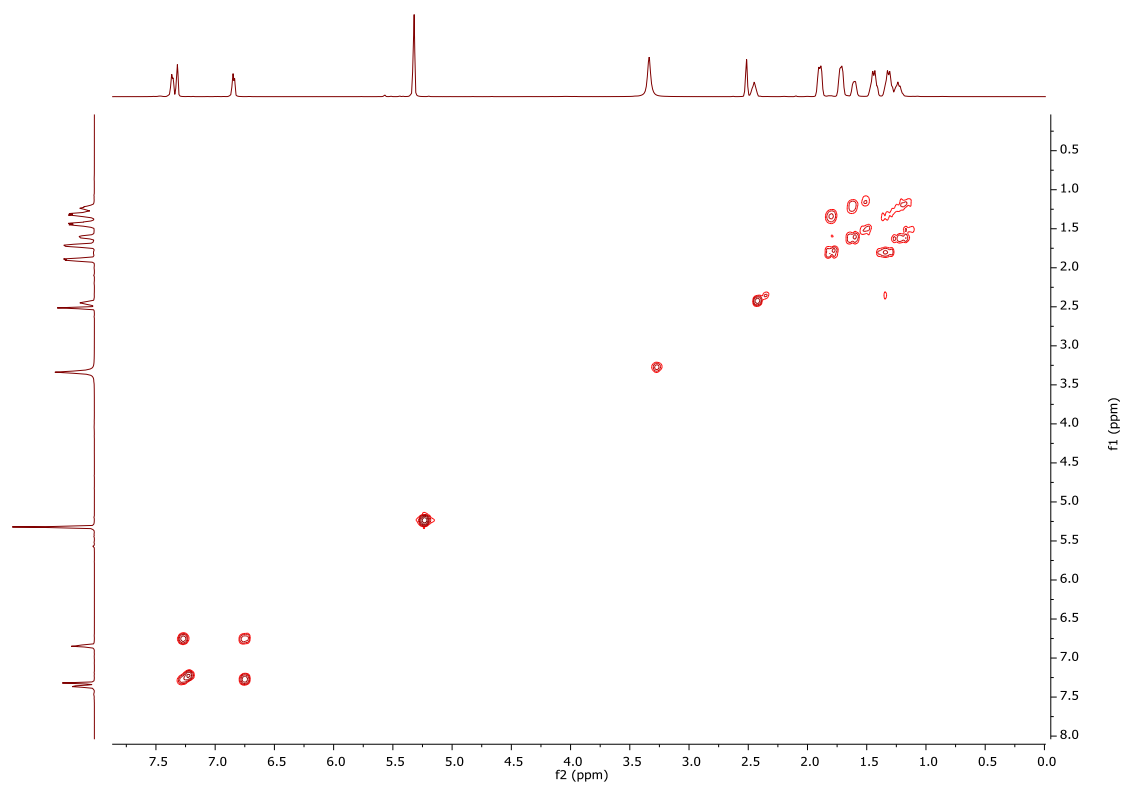

COSY spectrum of 3d

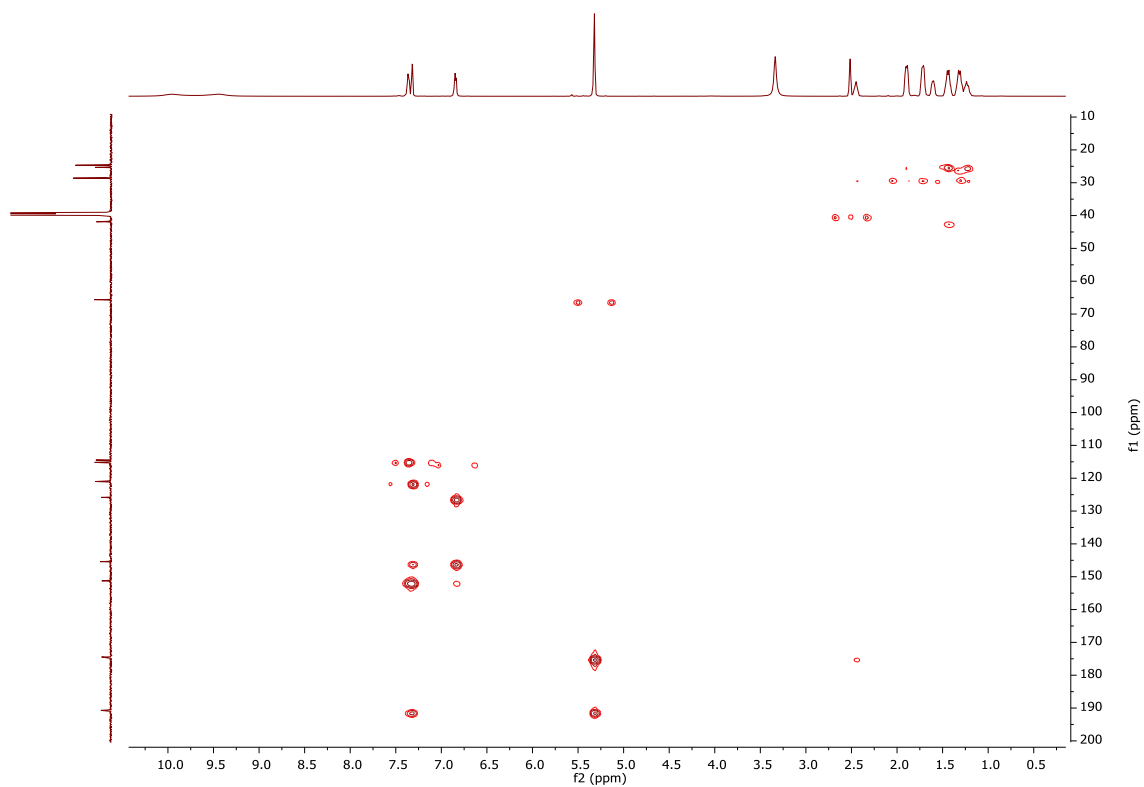

HMBC spectrum of **3d**

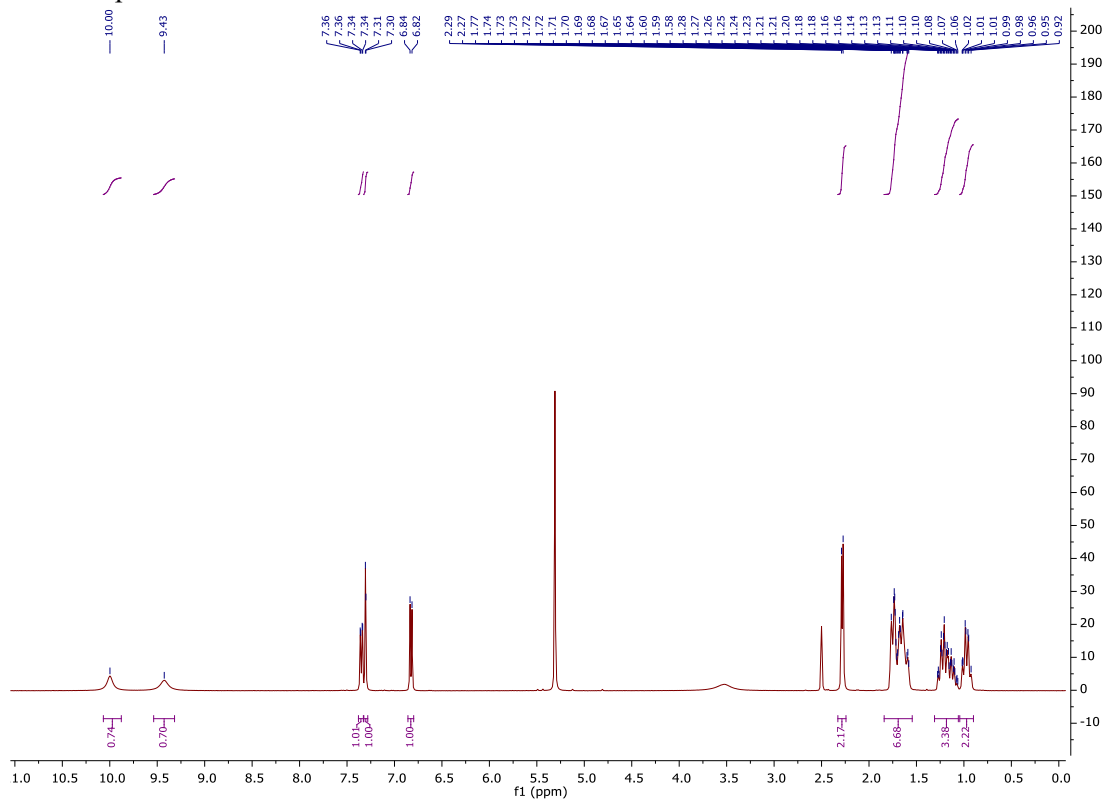

$^1\text{H}$ NMR spectrum of **3e**

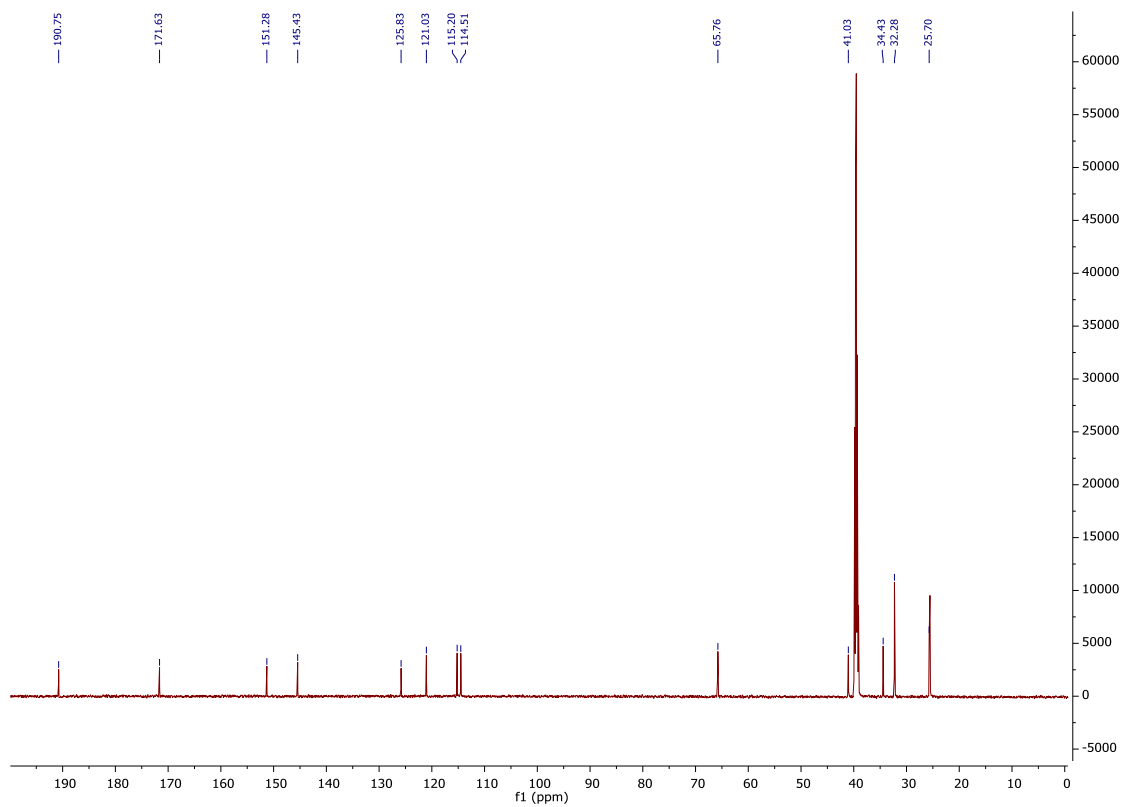

<sup>13</sup>C NMR spectrum of **3e**

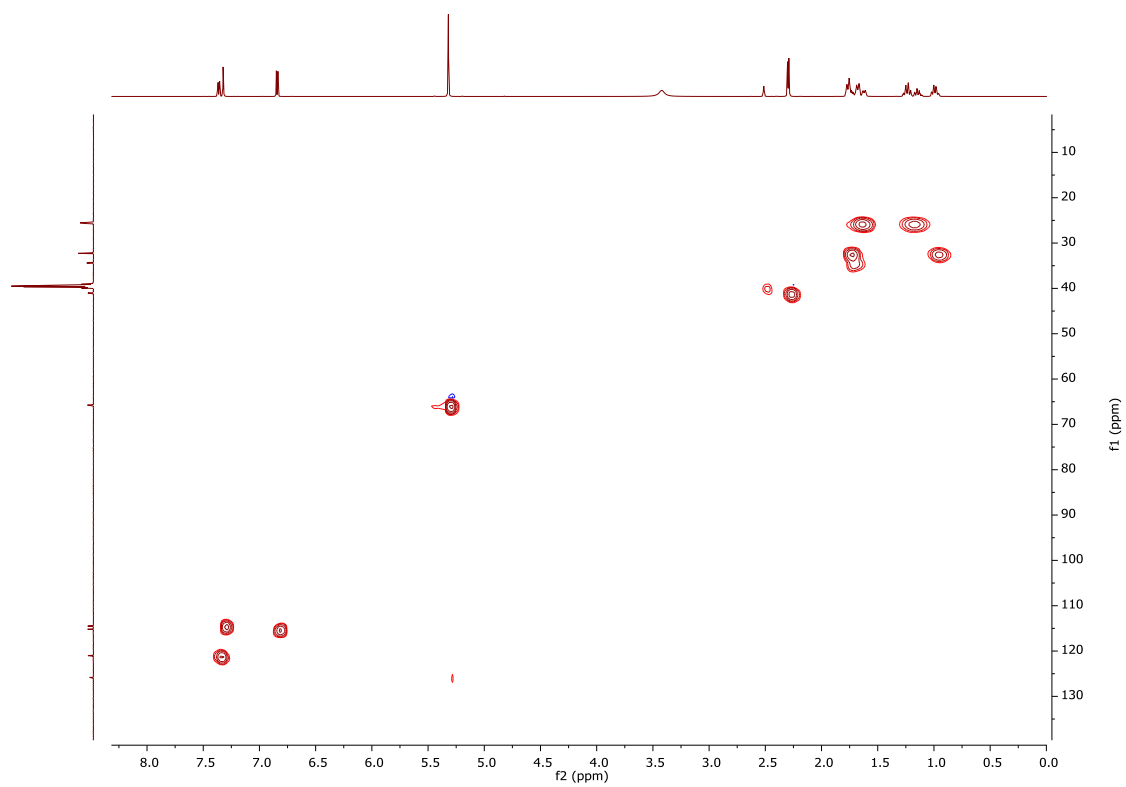

HSQC spectrum of **3e**

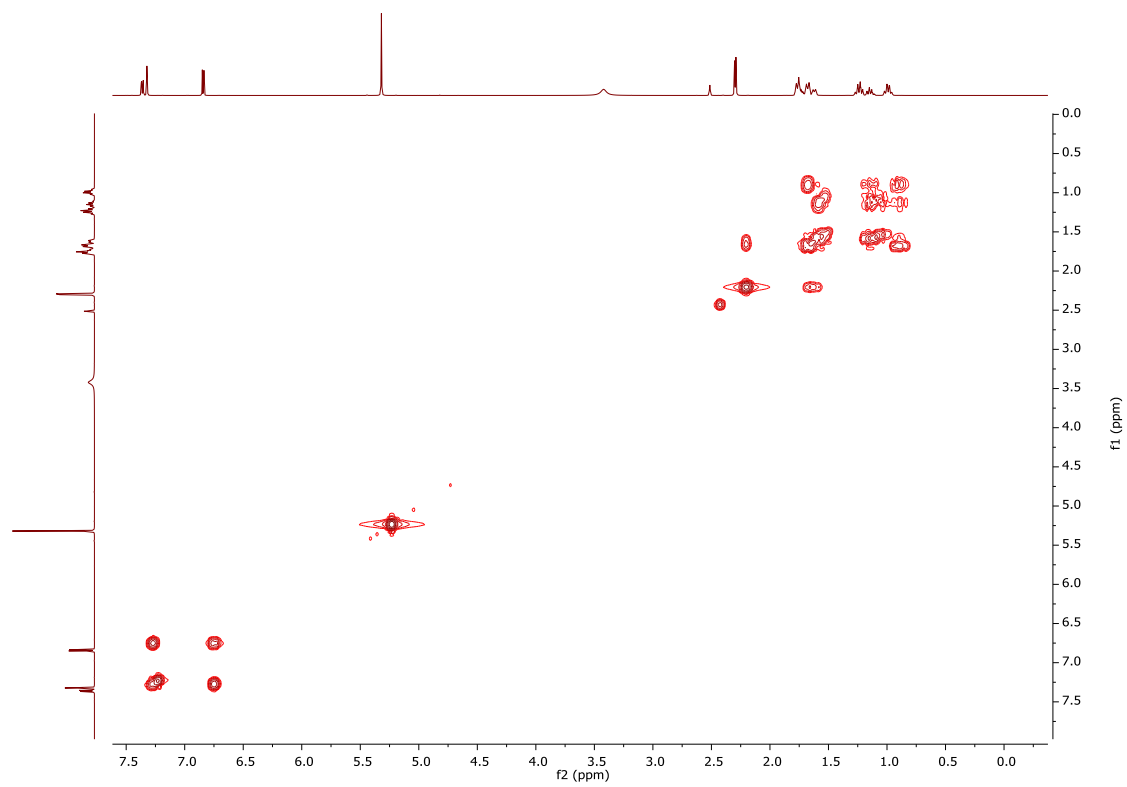

COSY spectrum of **3e**

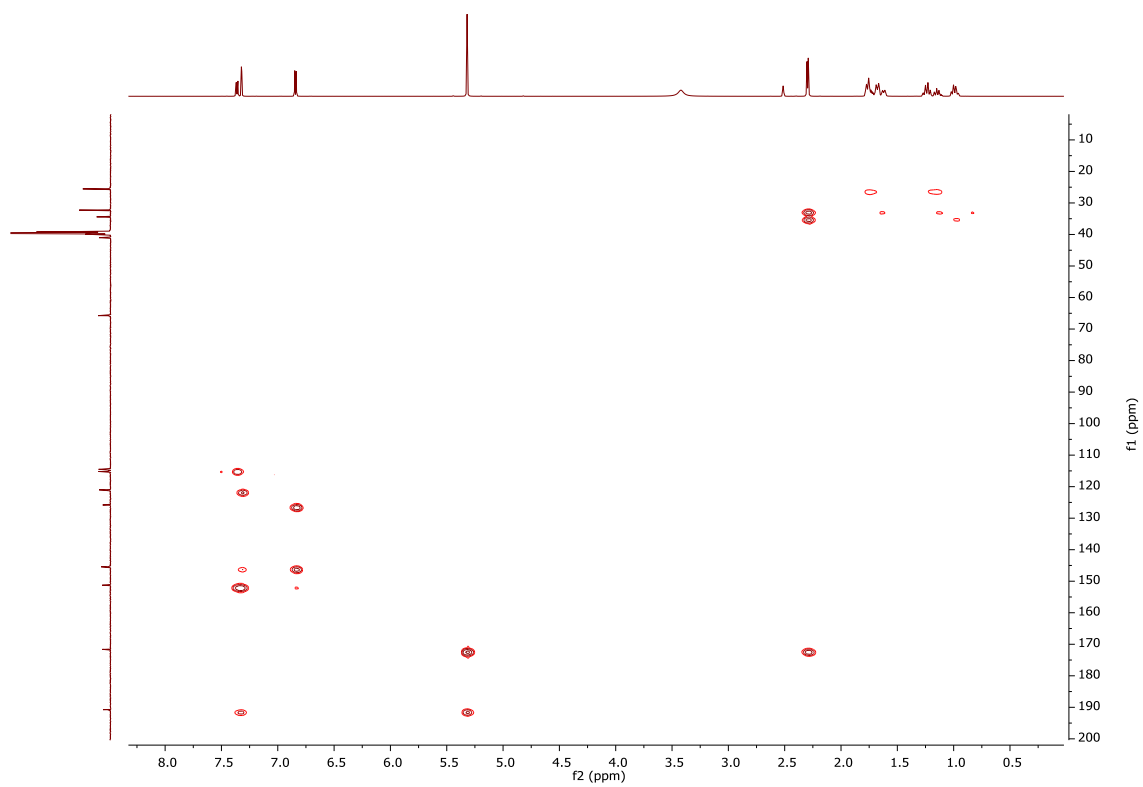

HMBC spectrum of **3e**

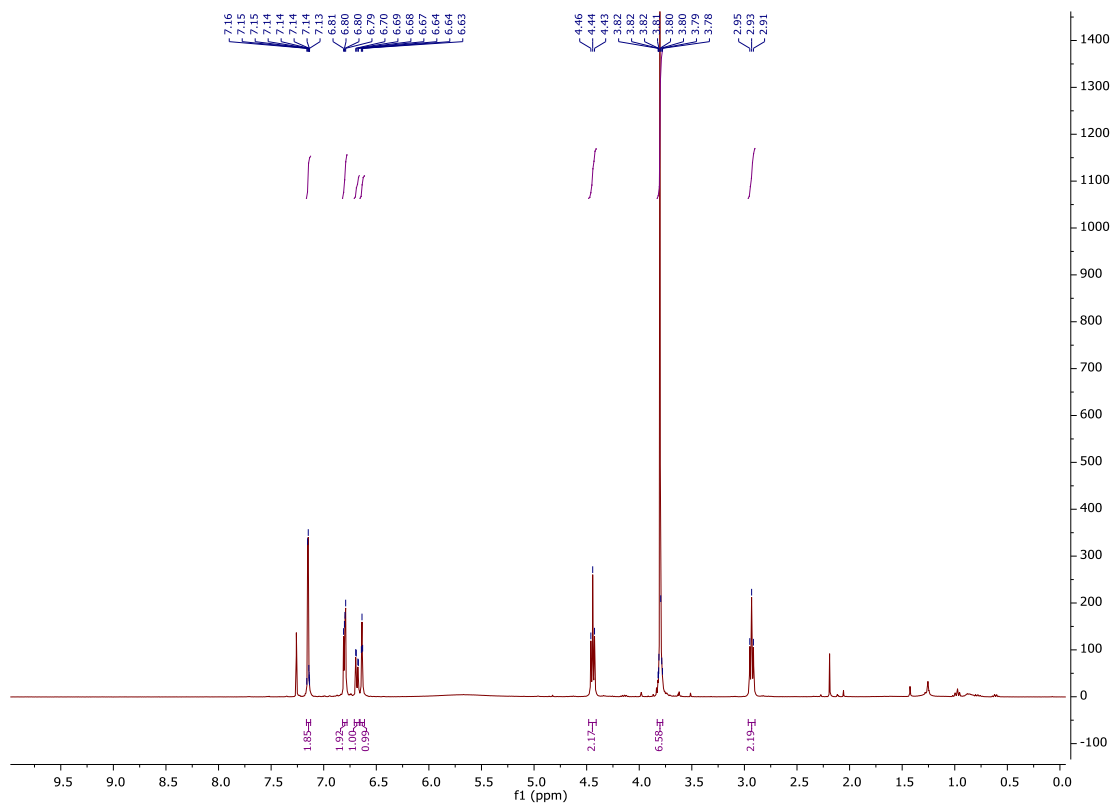

<sup>1</sup>H NMR spectrum of **4b**.

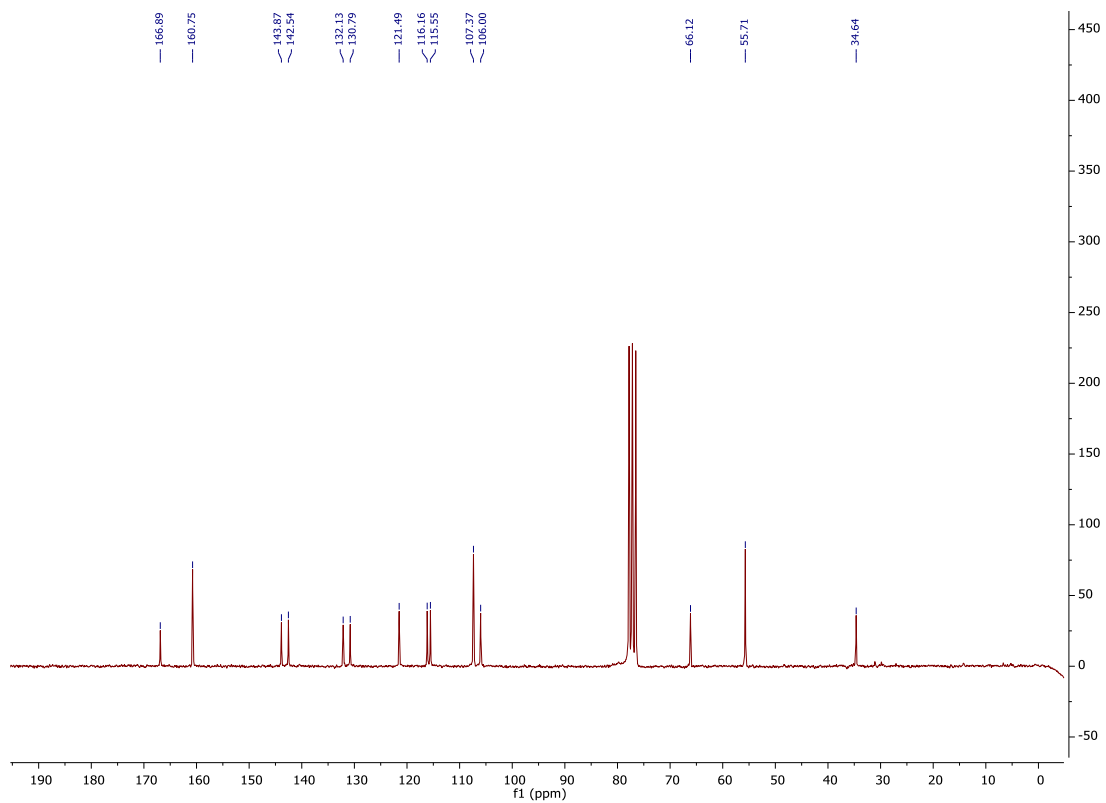

<sup>13</sup>C NMR spectrum of **4b**

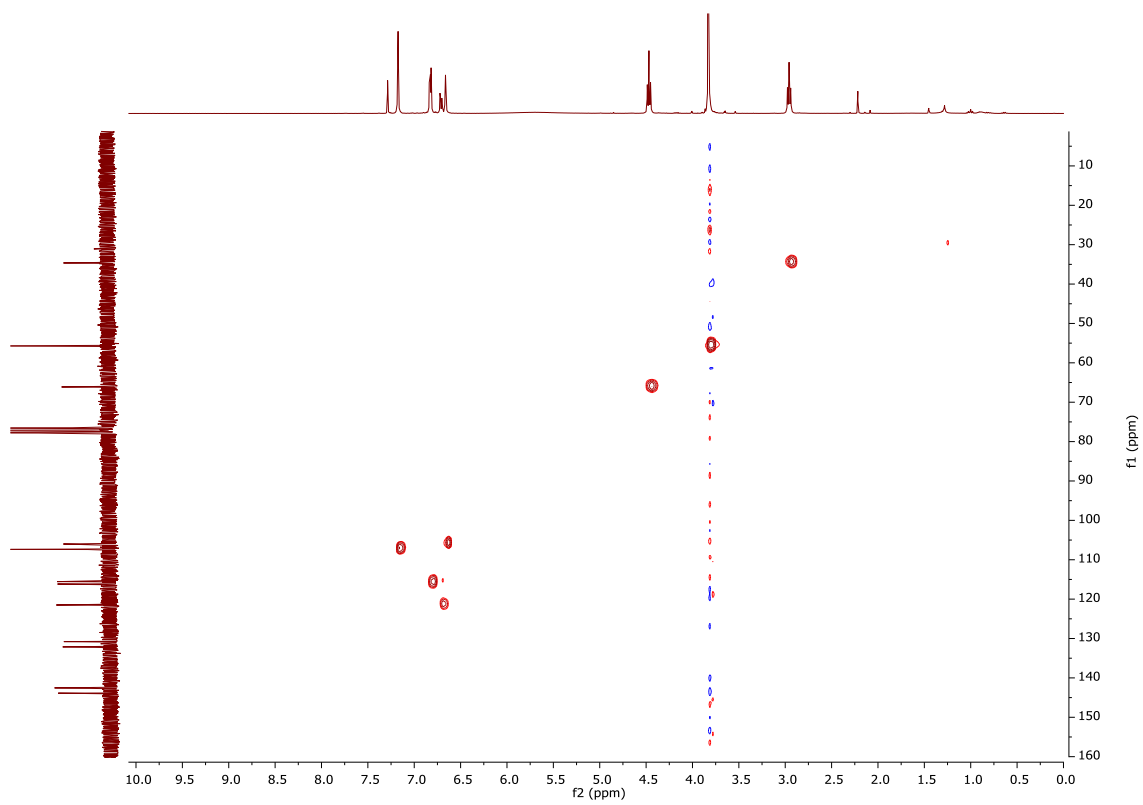

HSQC spectrum of **4b**.

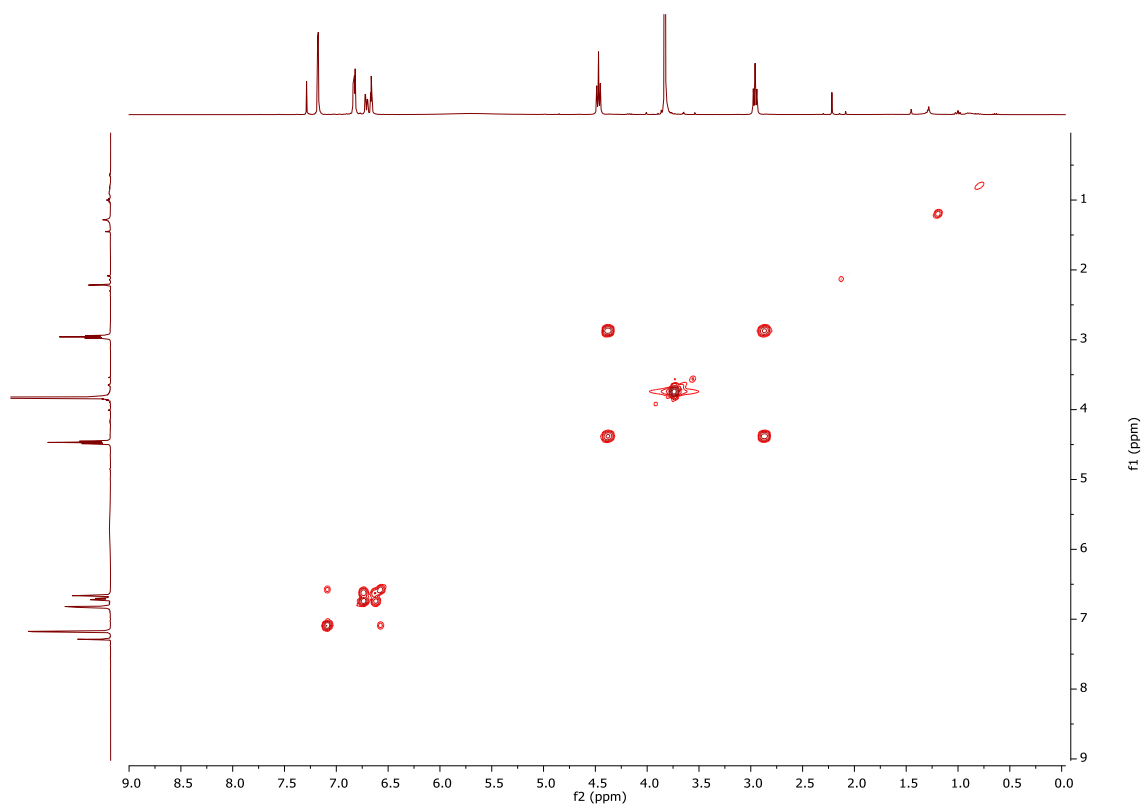

HSQC spectrum of **4b**.

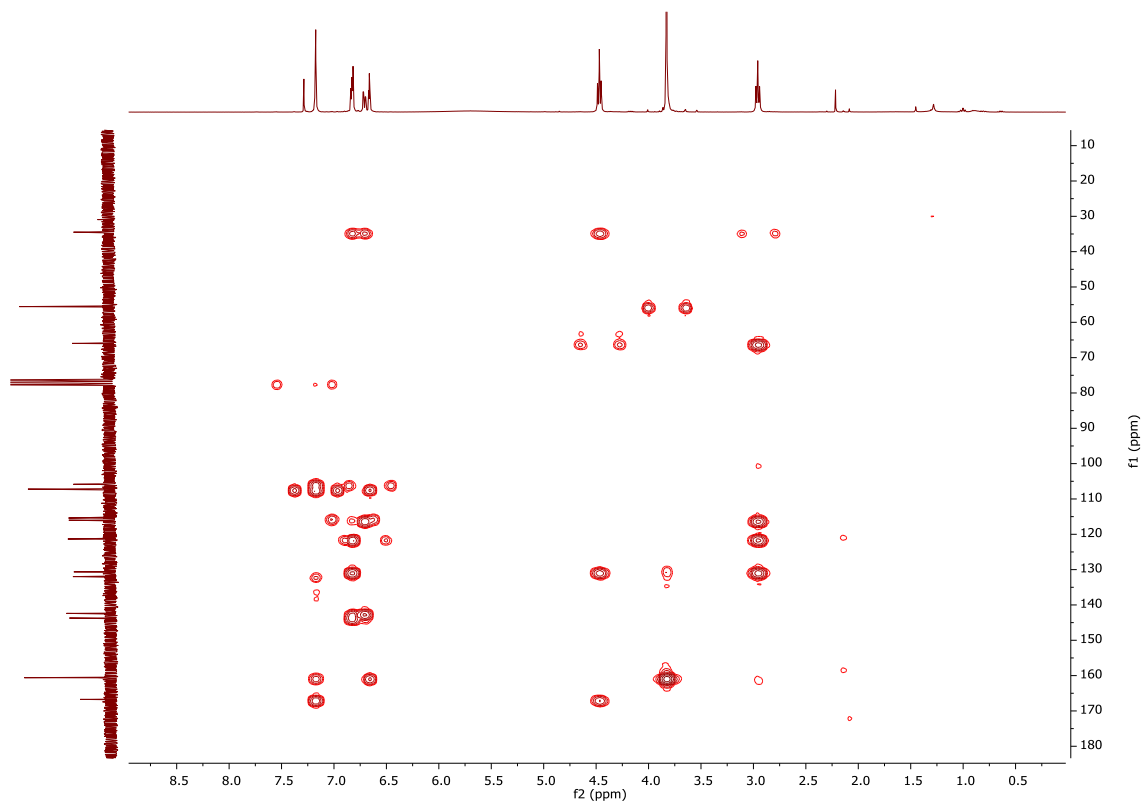

HMBC spectrum of **4b**.

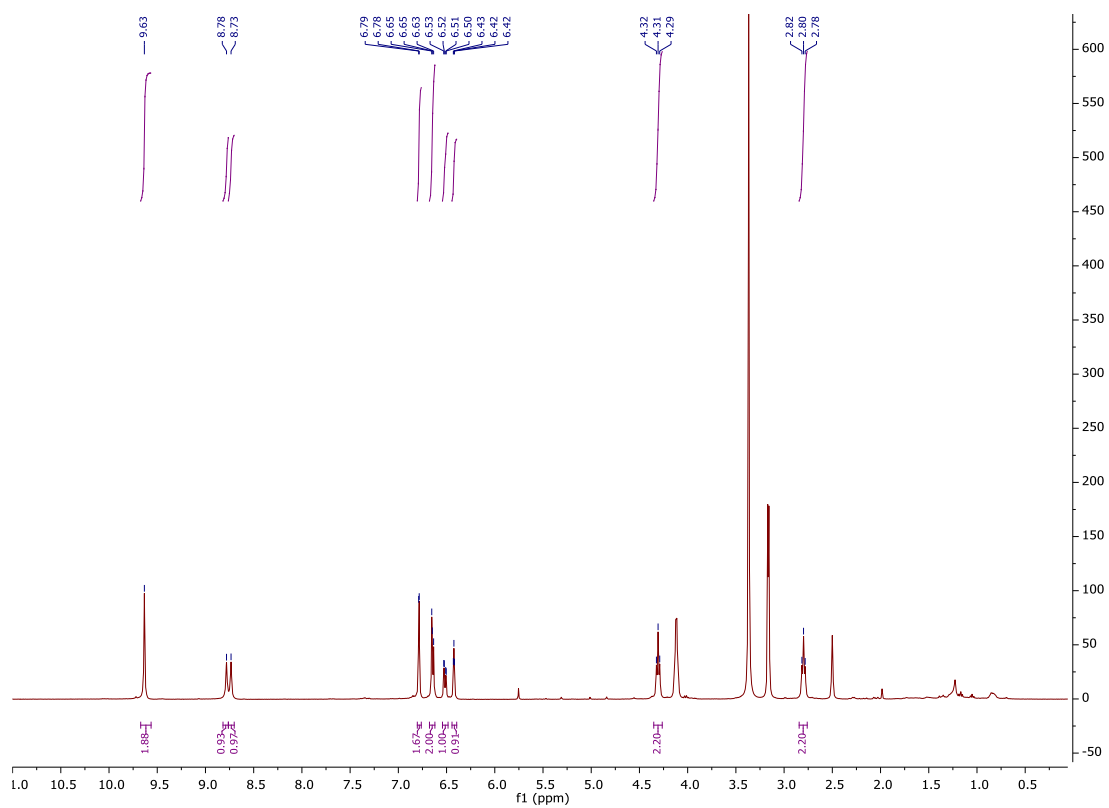

<sup>1</sup>H NMR spectrum of **4c**.

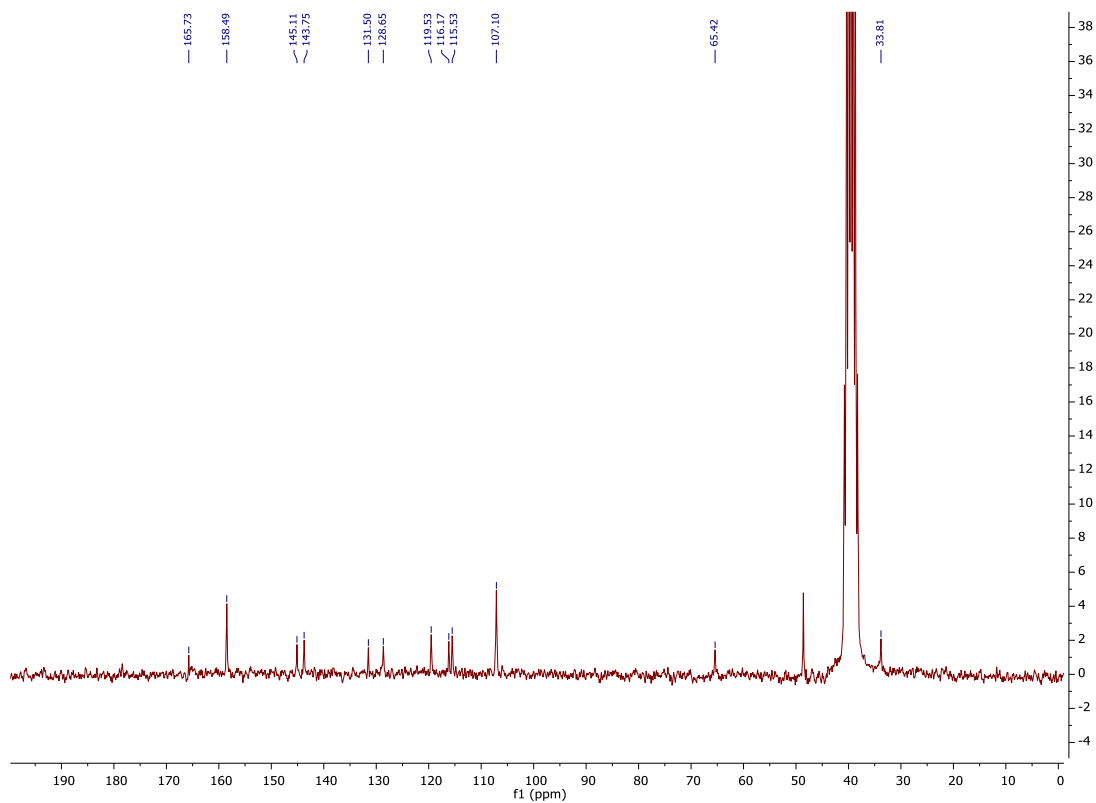

$^{13}\text{C}$  NMR spectrum of **4c**

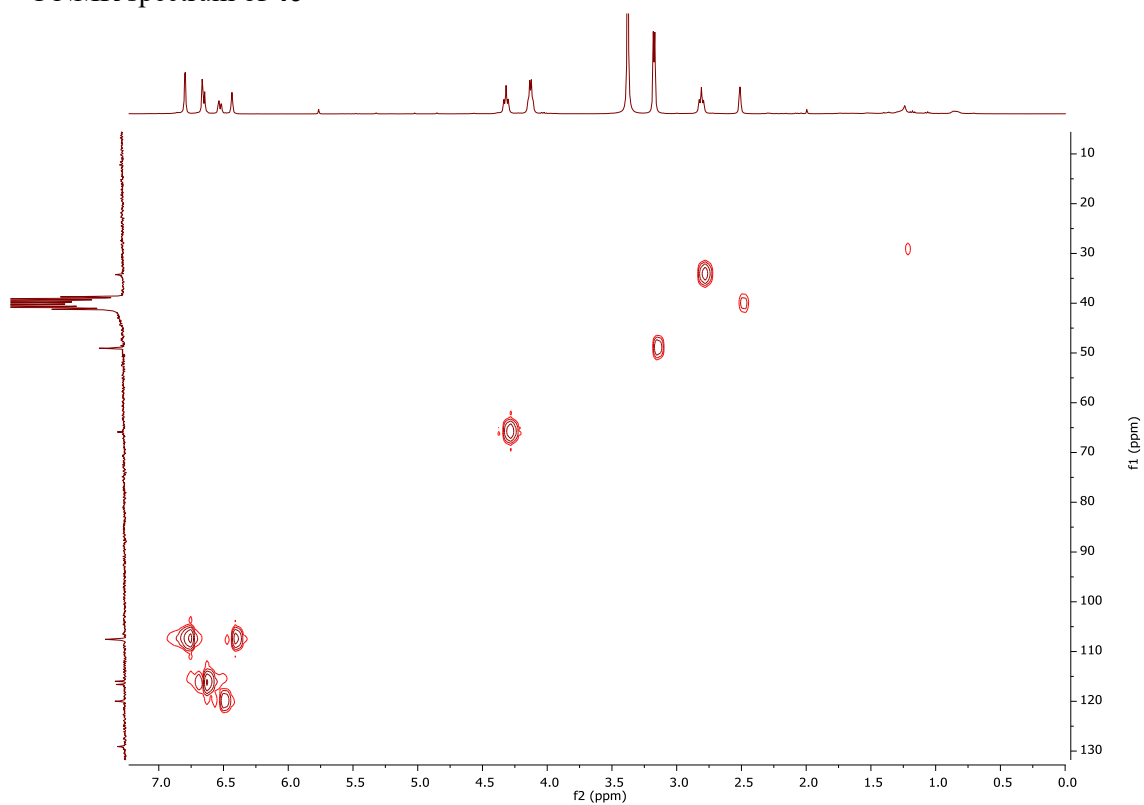

HSQC spectrum of **4c**

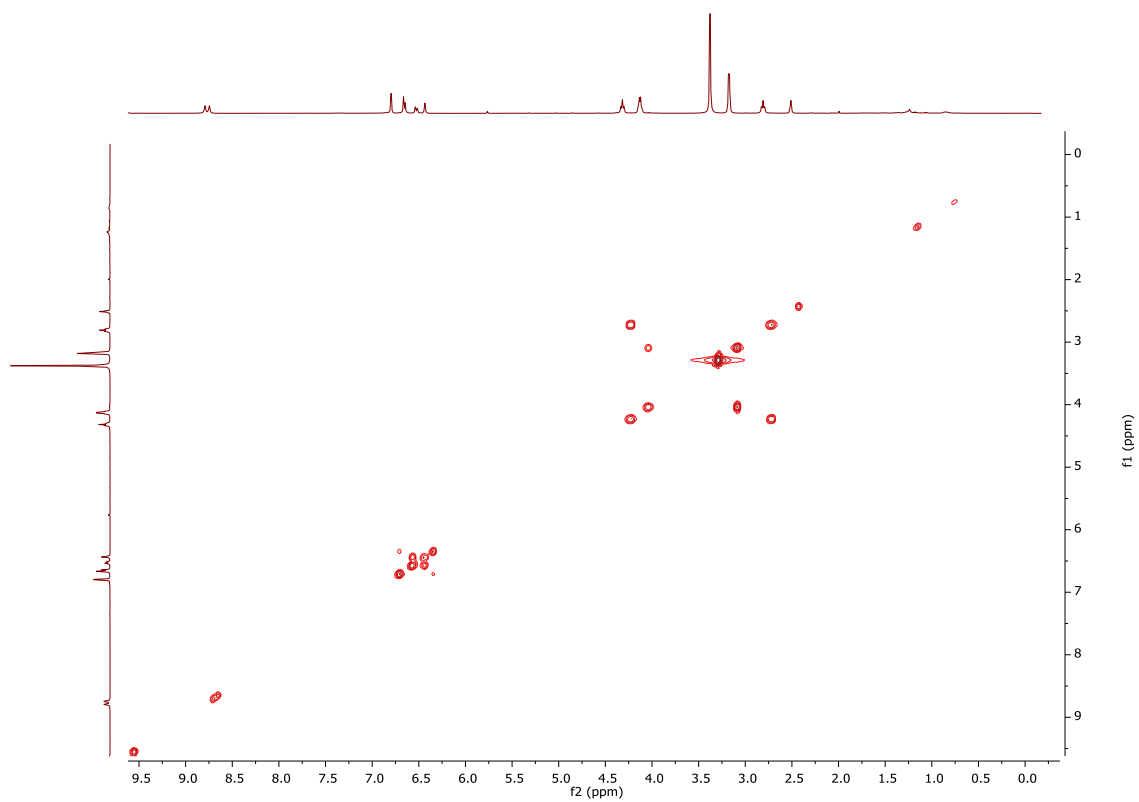

COSY spectrum of **4c**

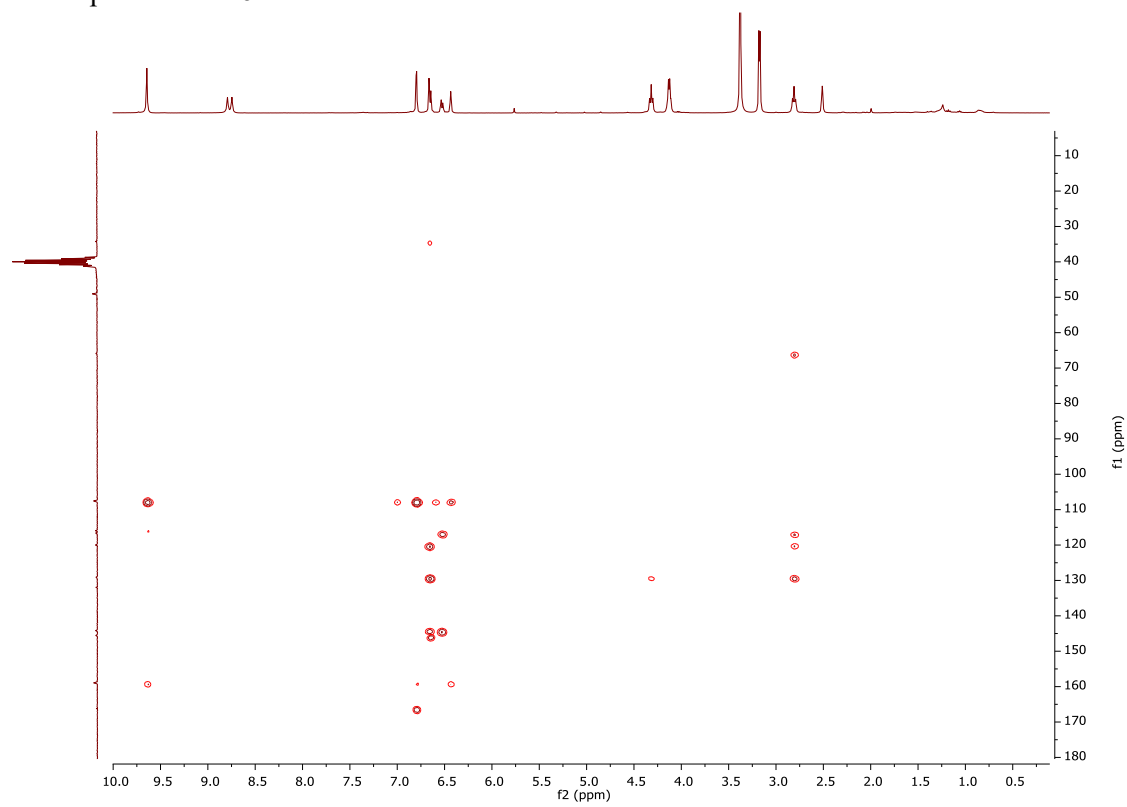

HMBC spectrum of **4c**

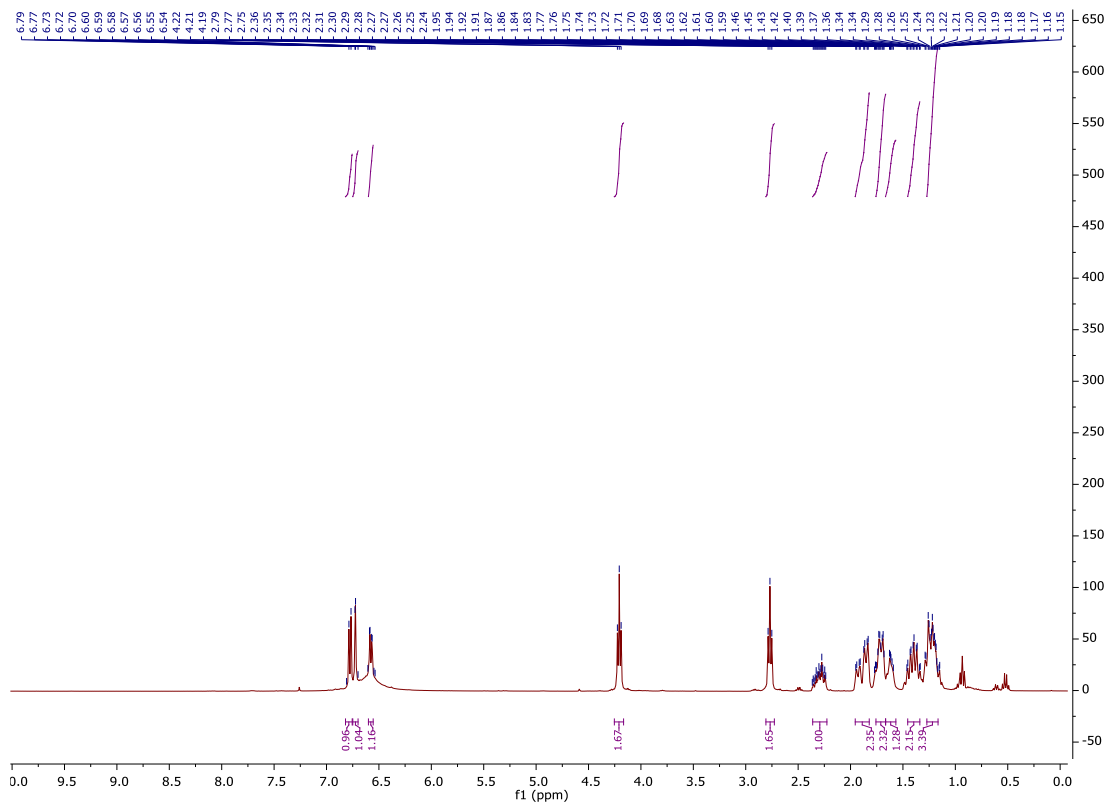

$^1\text{H}$ NMR spectrum of **4d**.

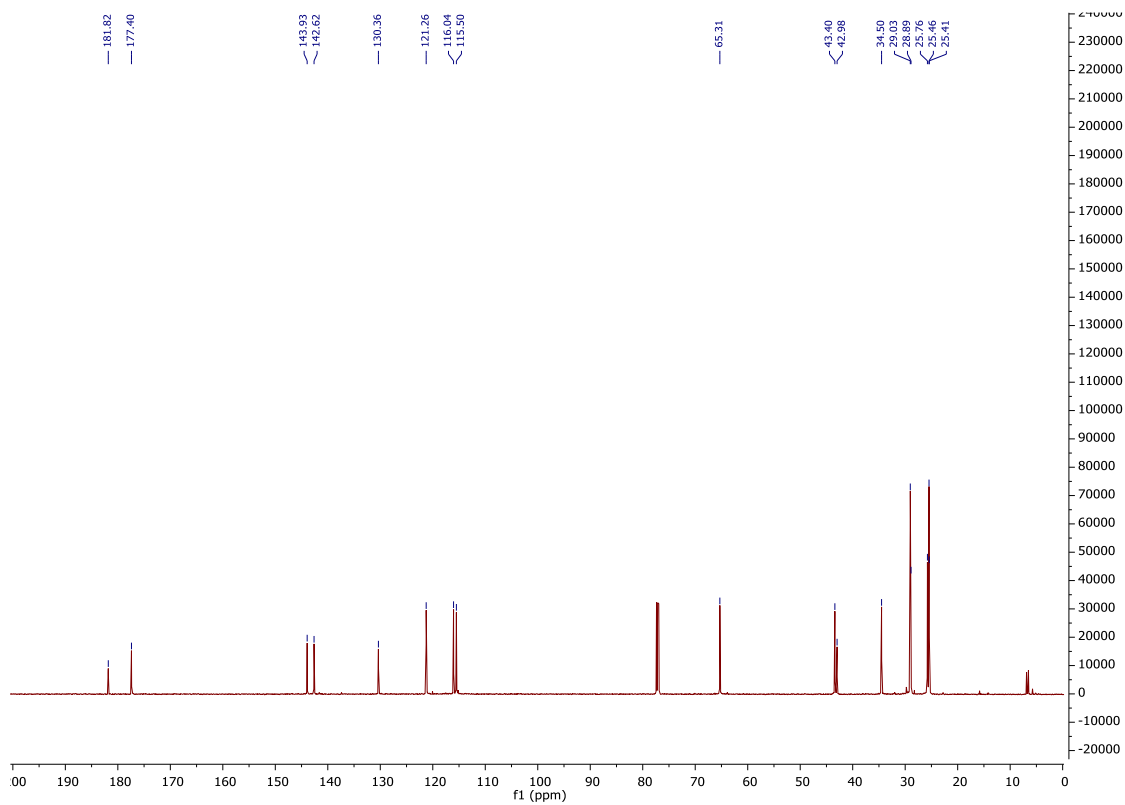

$^{13}\text{C}$ NMR spectrum of **4d**.

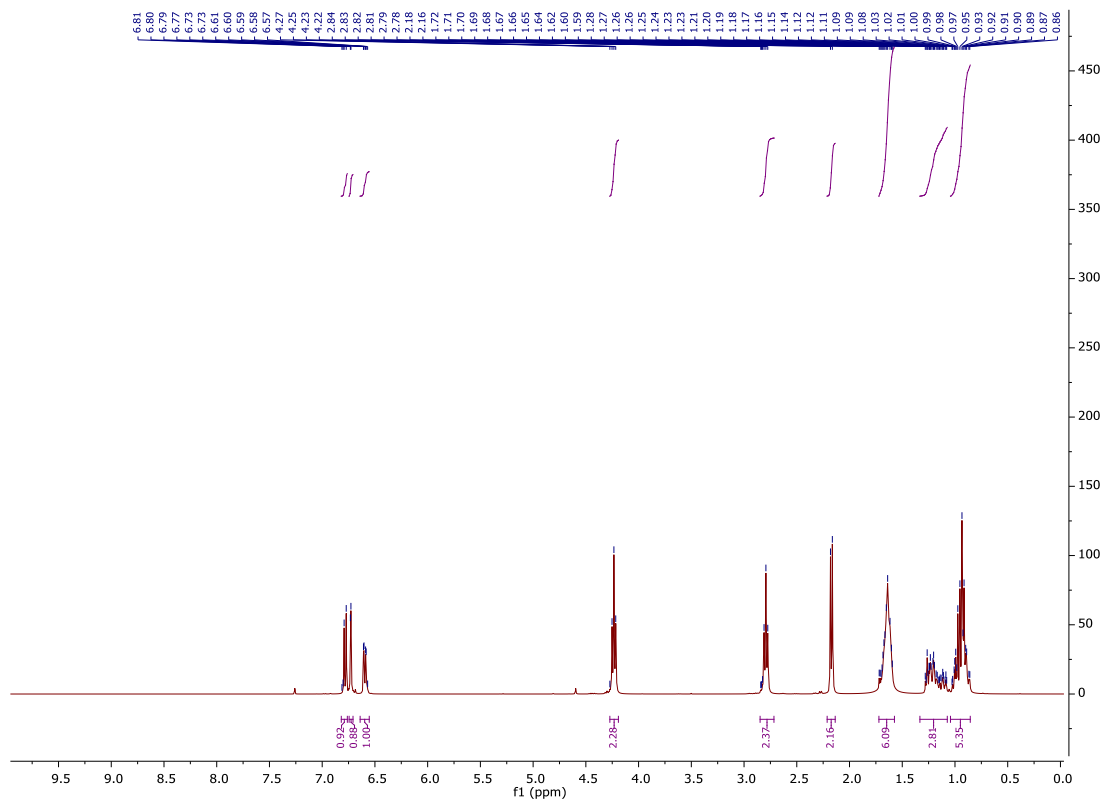

**<sup>1</sup>H NMR spectrum of 4e**

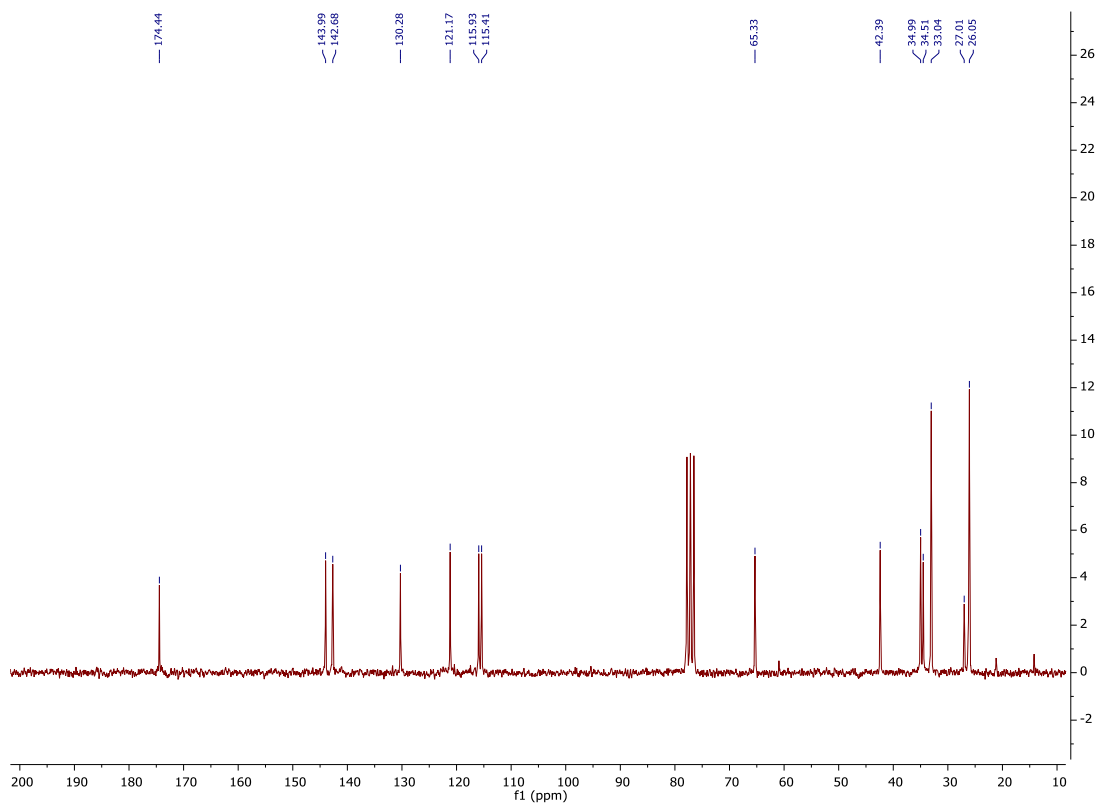

**<sup>13</sup>C NMR spectrum of 4e**

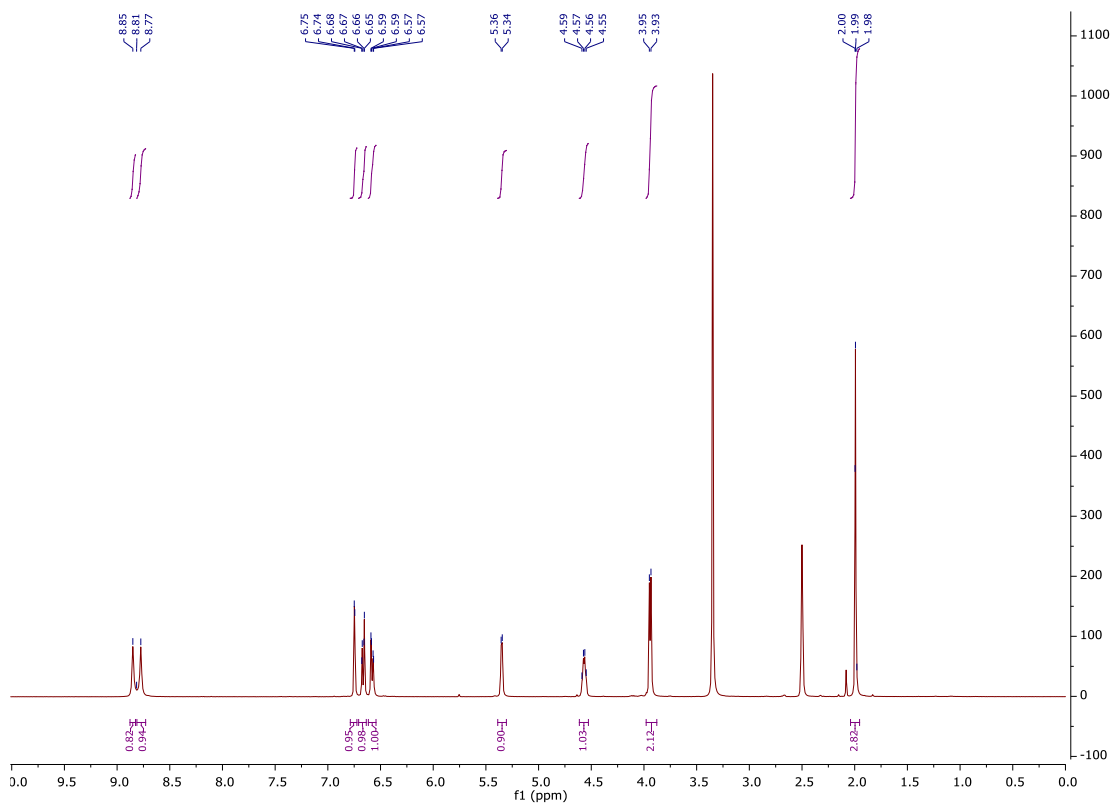

<sup>1</sup>H NMR spectrum of **5a**.

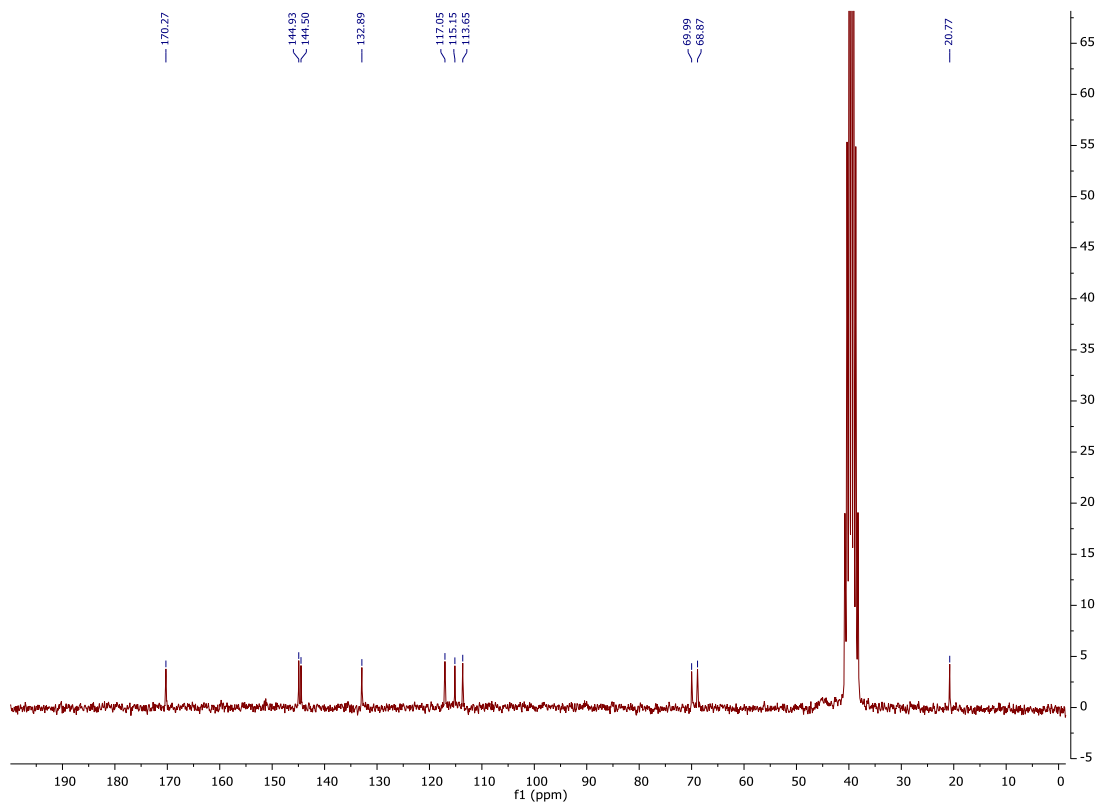

<sup>13</sup>C NMR spectrum of **5a**

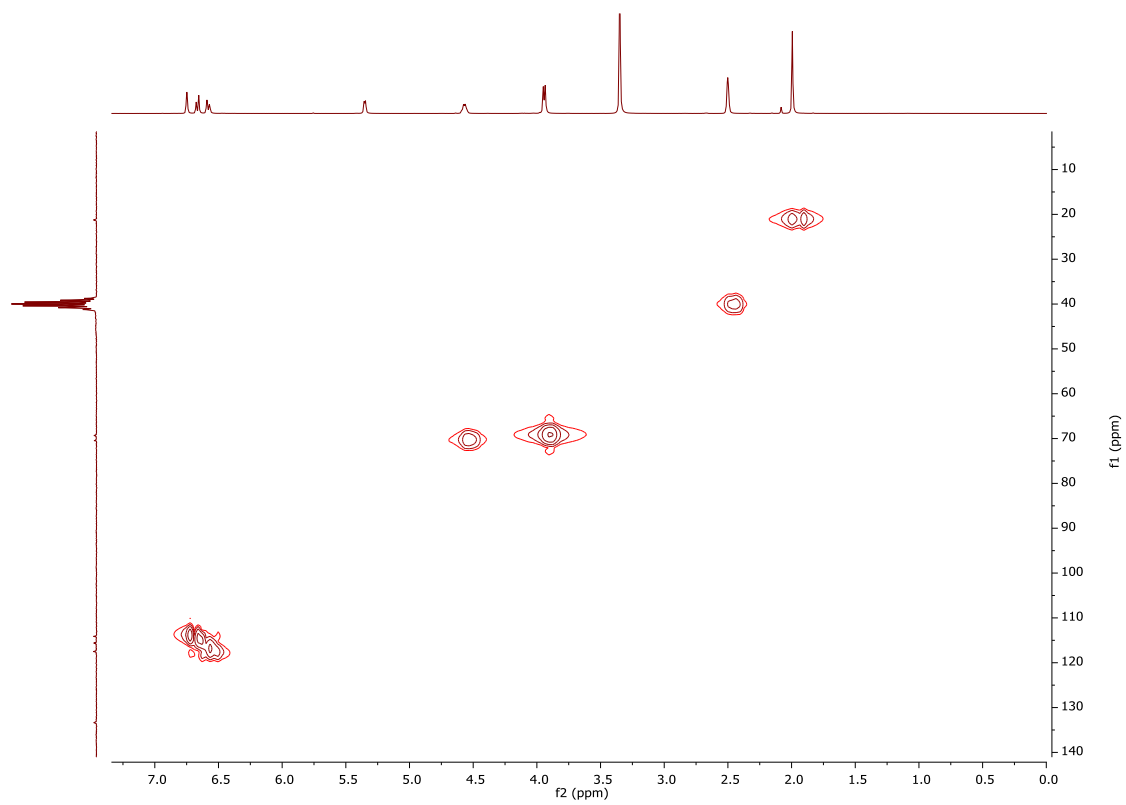

HSQC spectrum of **5a**

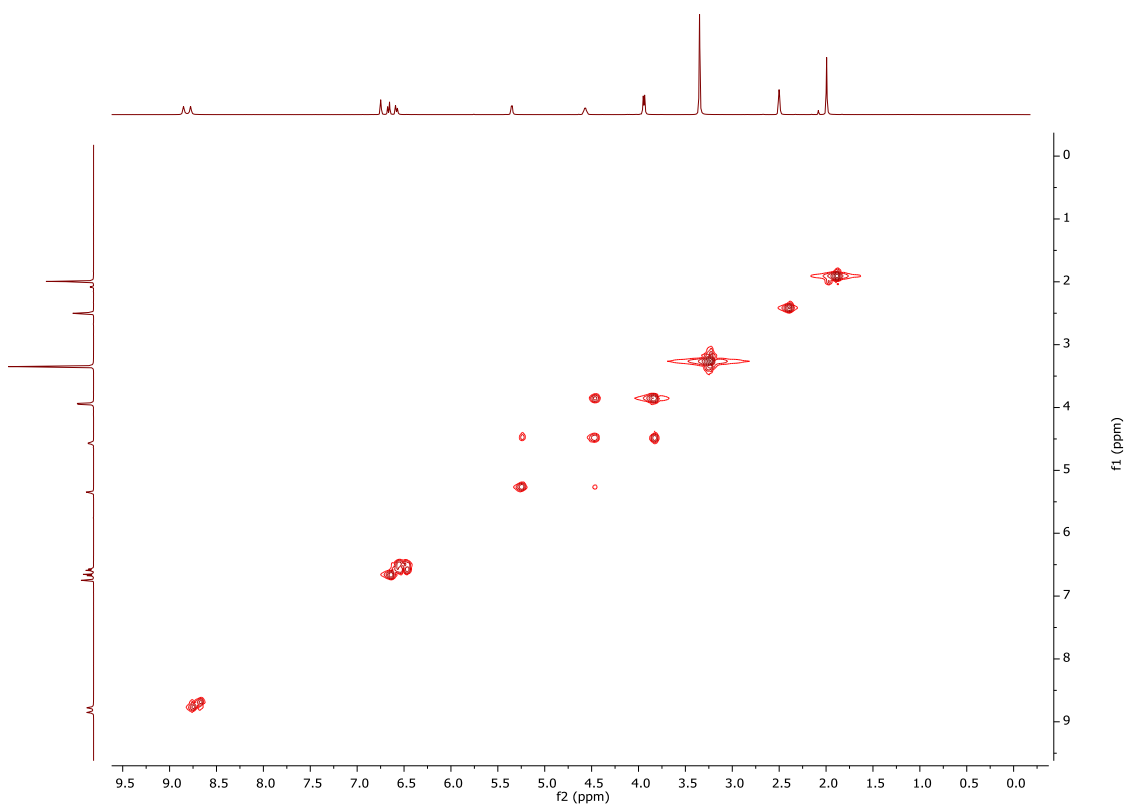

COSY spectrum of **5a**

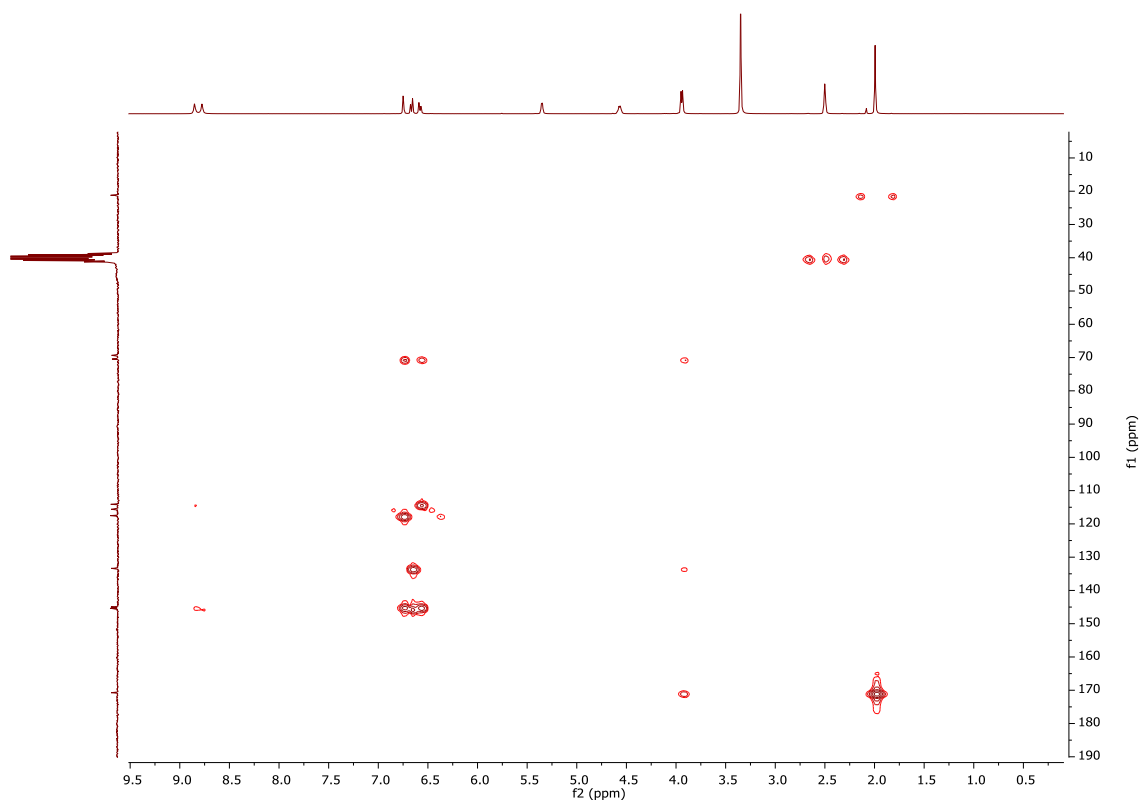

HMBC spectrum of **5a**

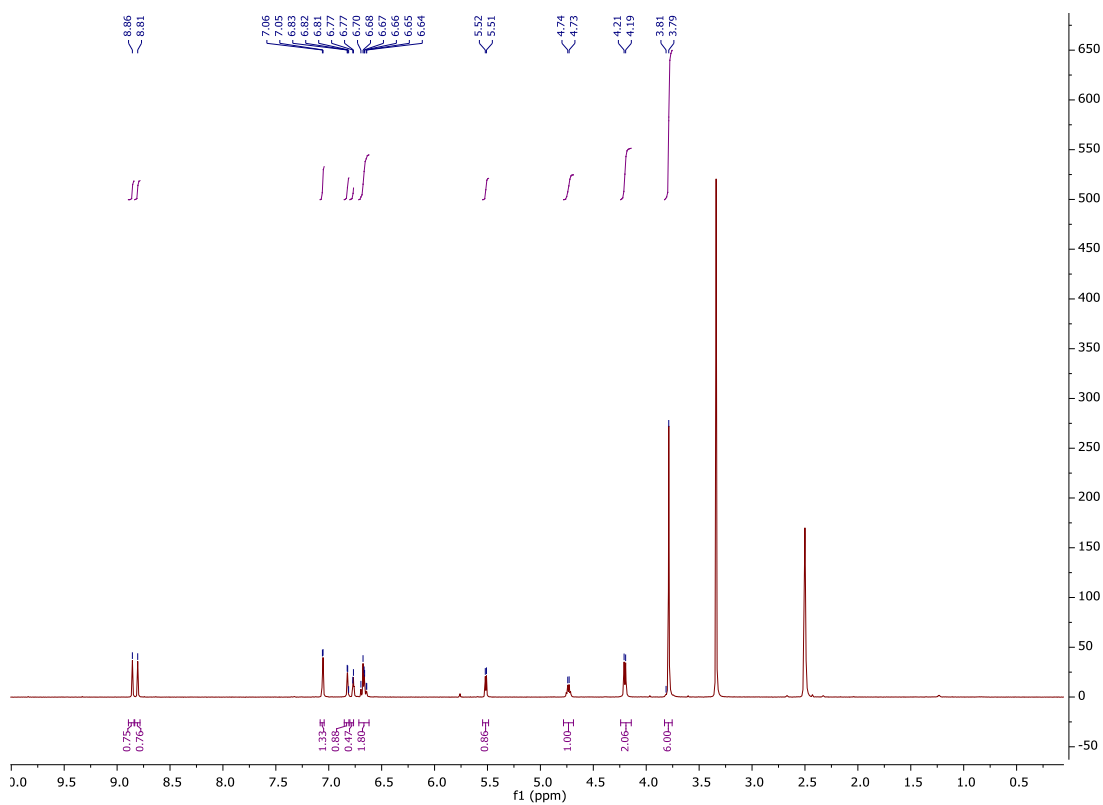

$^1\text{H}$ NMR spectrum of **5b**.

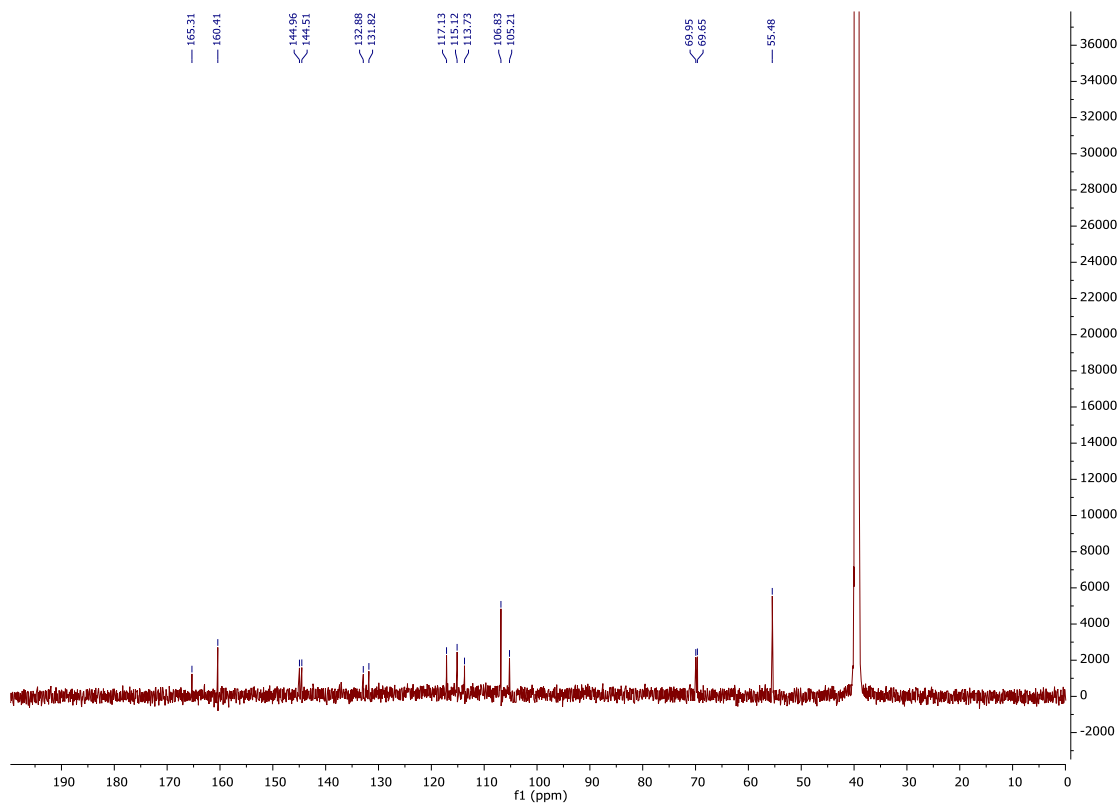

<sup>13</sup>C NMR spectrum of **5b**.

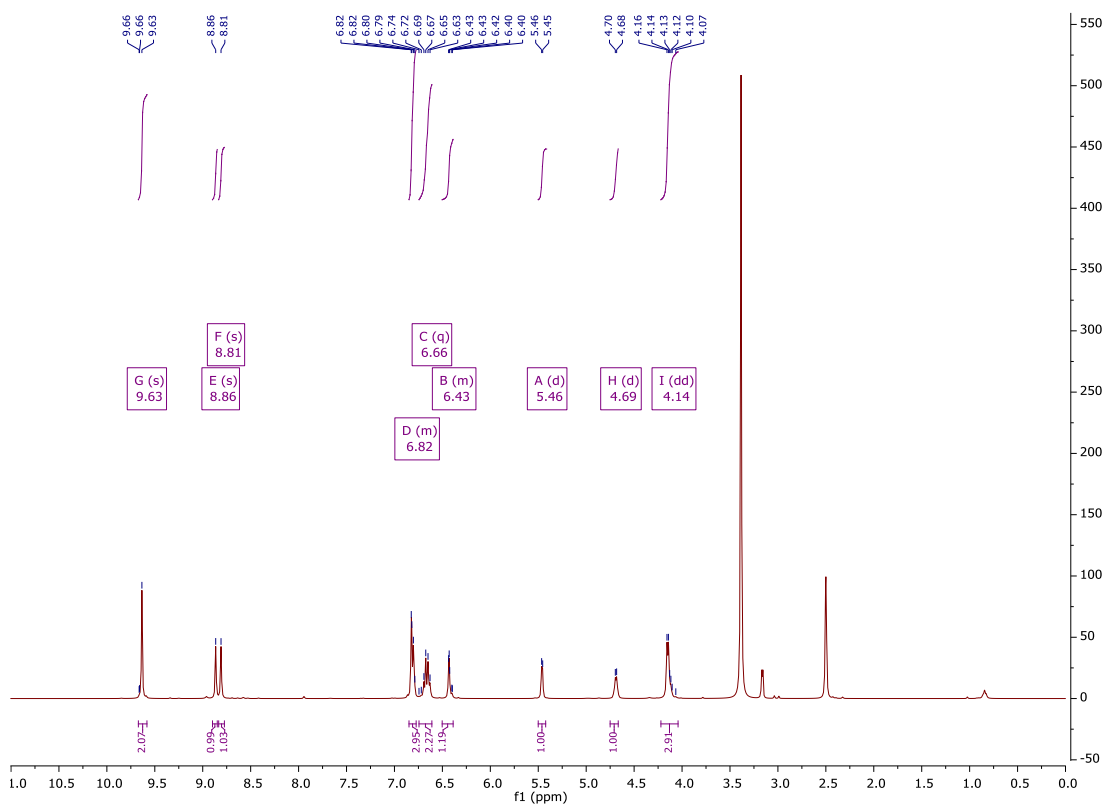

<sup>1</sup>H NMR spectrum of **5c**.

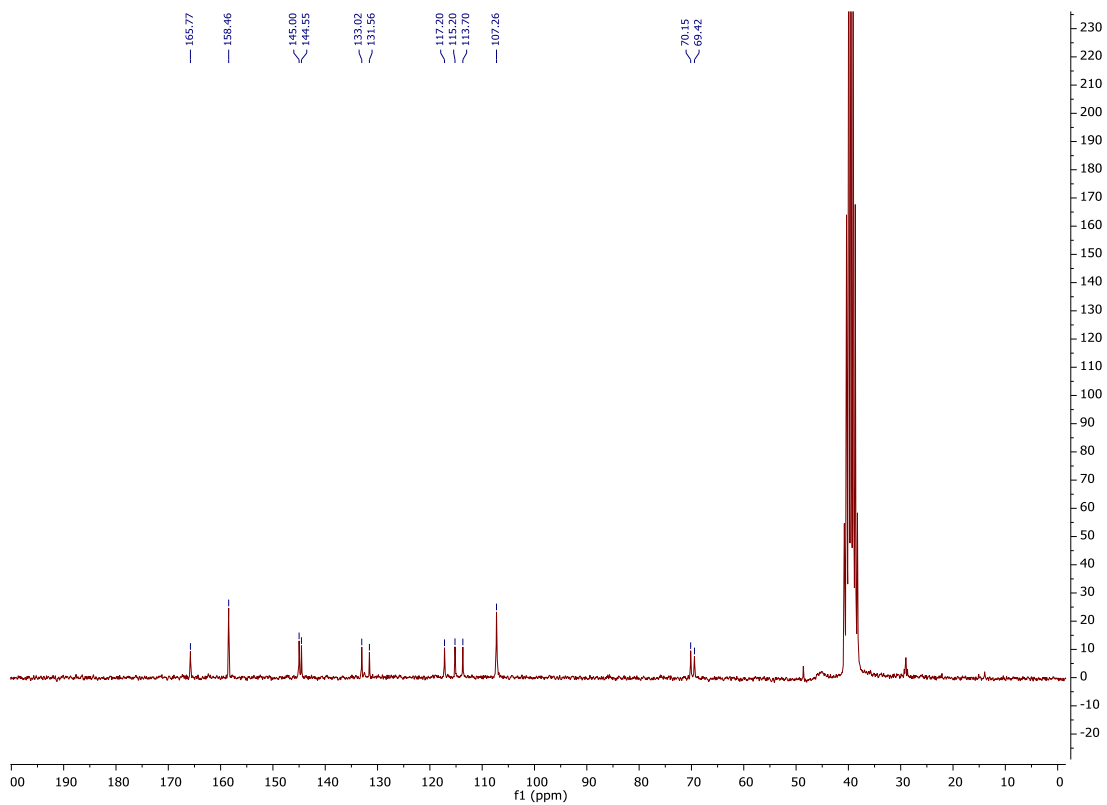

$^{13}\text{C}$  NMR spectrum of **5c**.

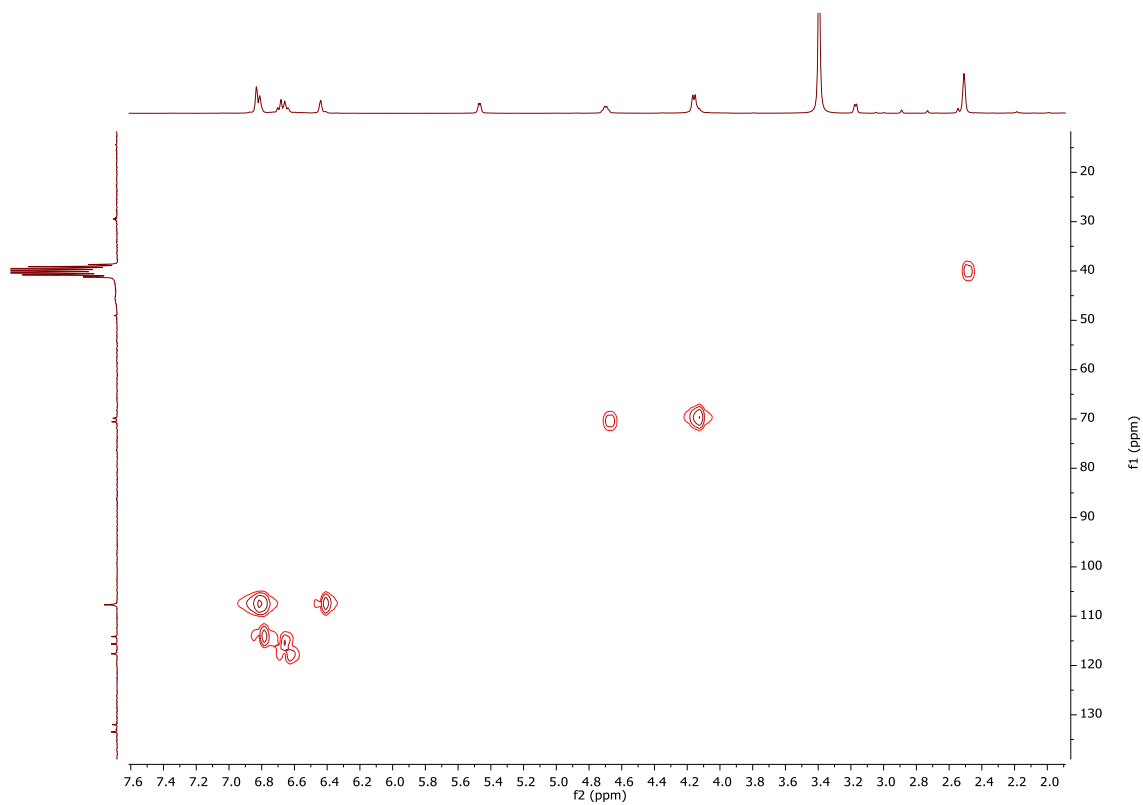

HSQC spectrum of **5c**

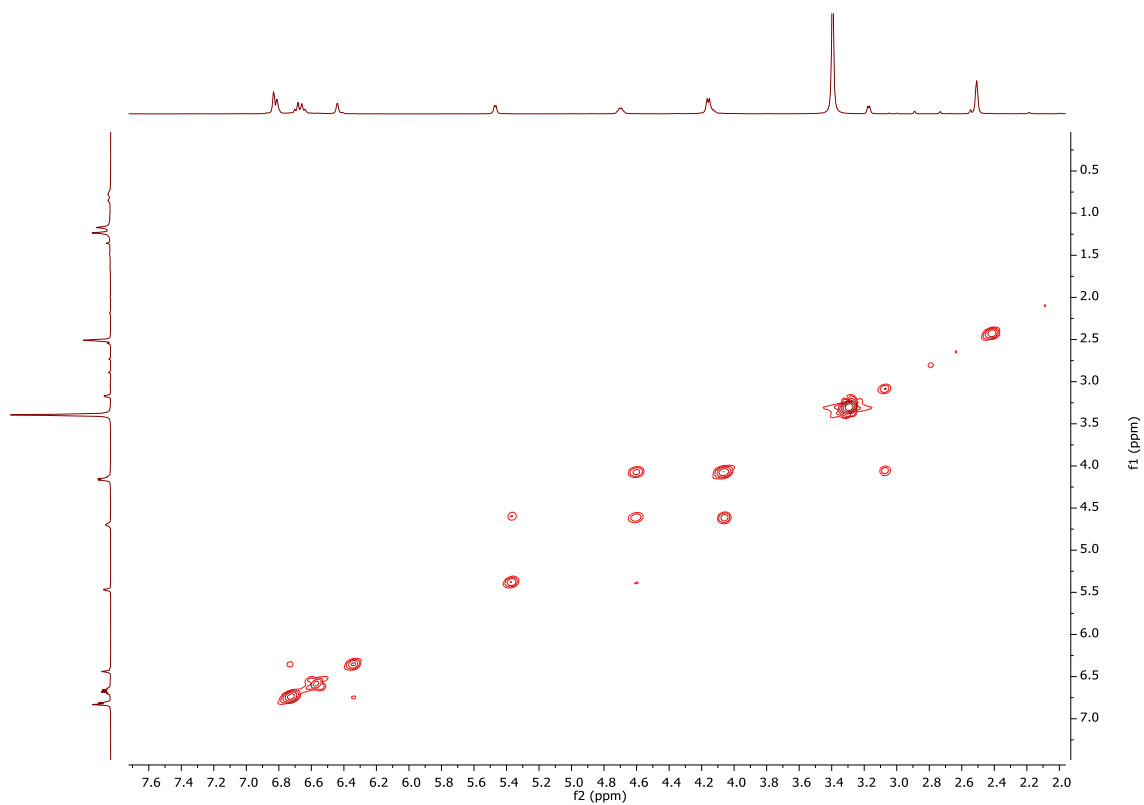

COSY spectrum of **5c**

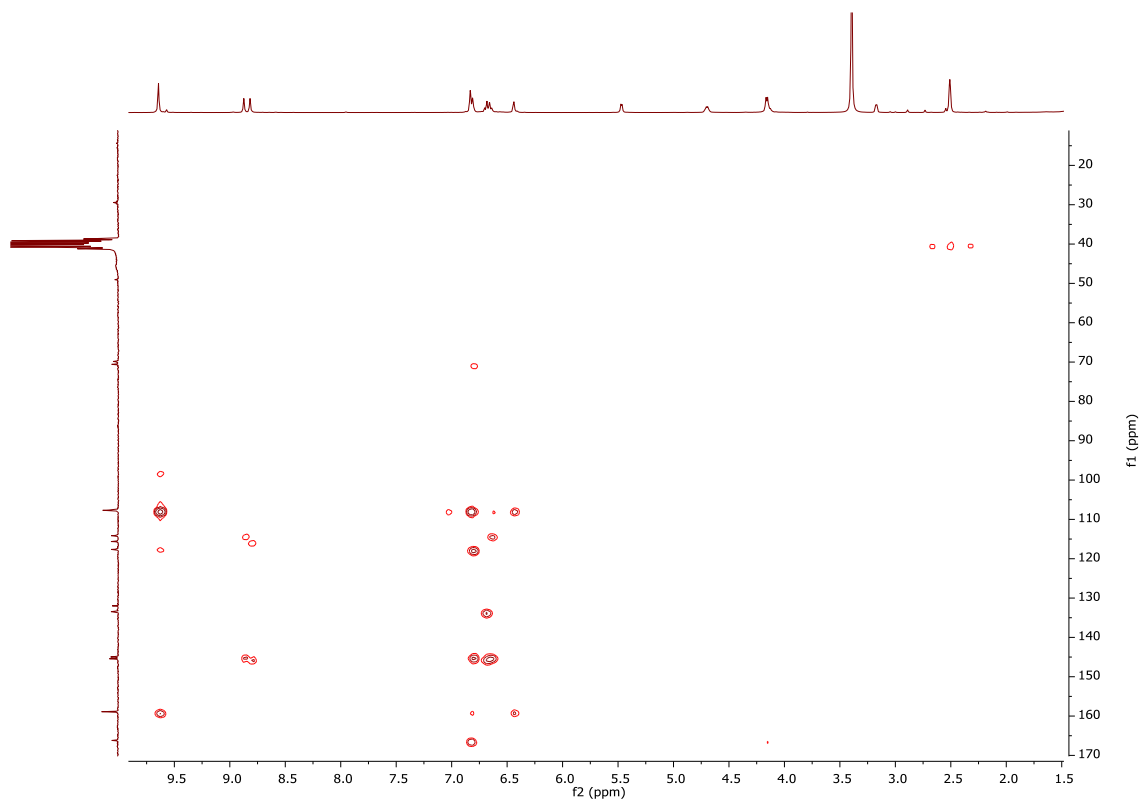

HMBC spectrum of **5c**

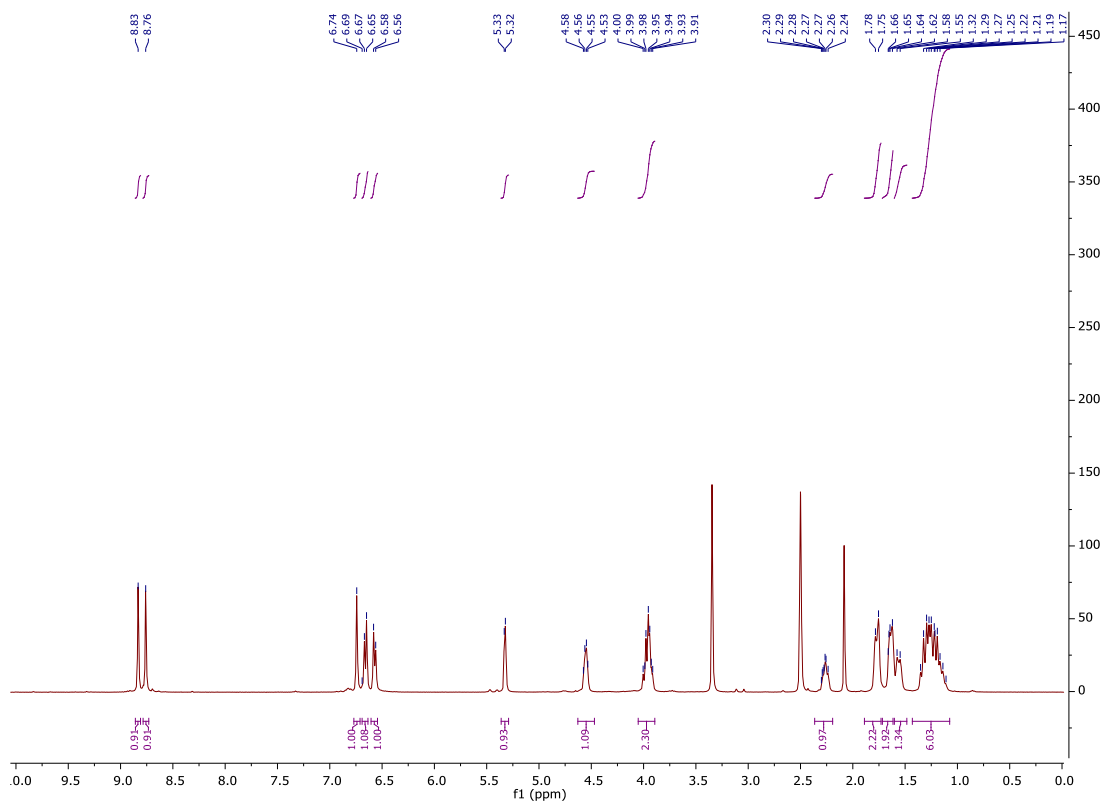

$^1\text{H}$  NMR spectrum of **5d**.

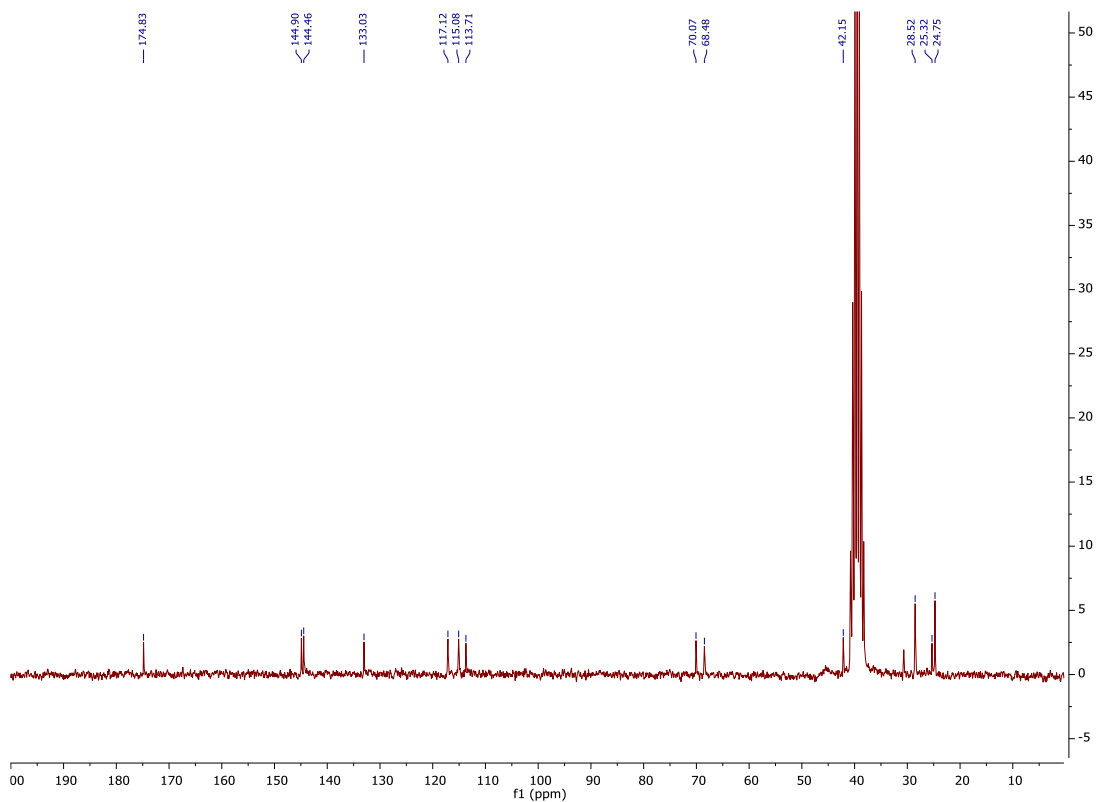

NMR spectrum of **5d**.

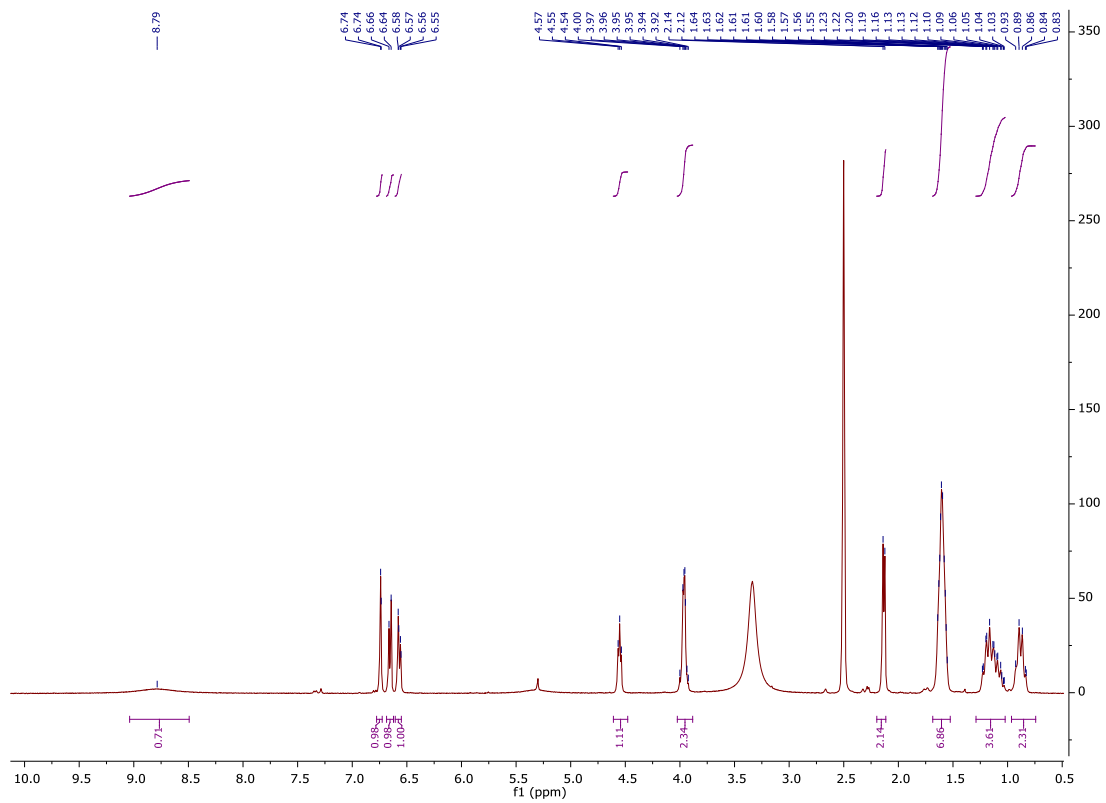

<sup>1</sup>H NMR spectrum of 5e.

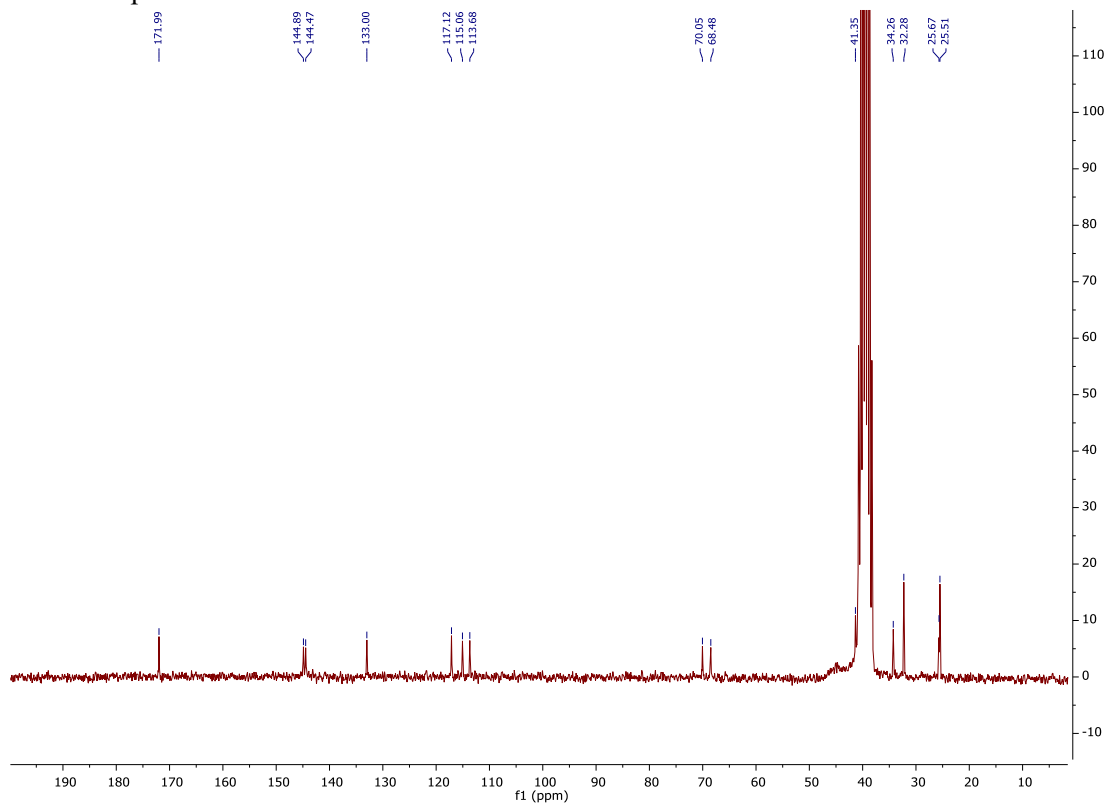

<sup>13</sup>C NMR spectrum of 5e

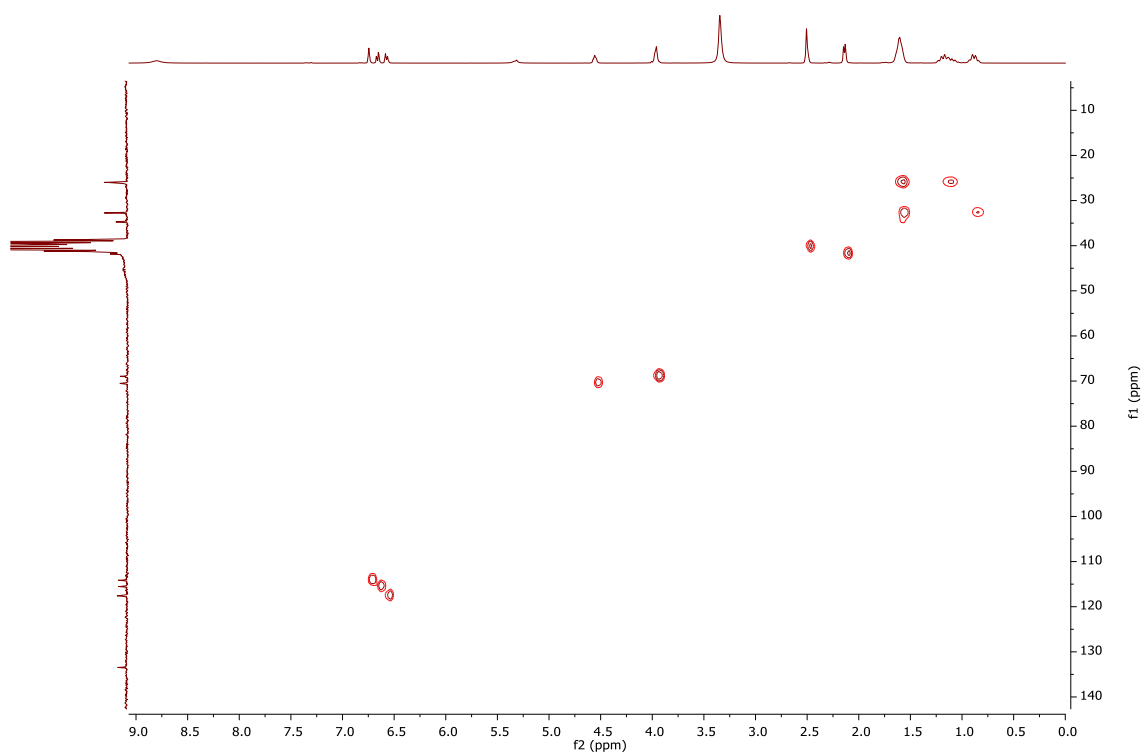

HSQC spectrum of **5e**

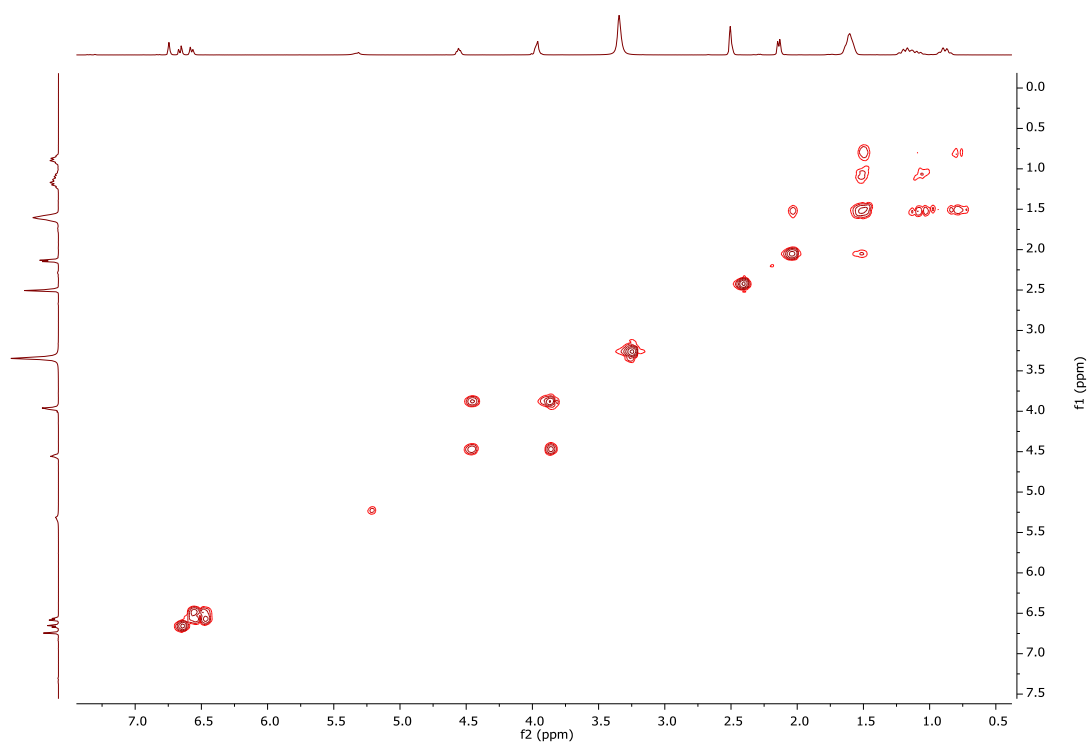

COSY spectrum of **5e**

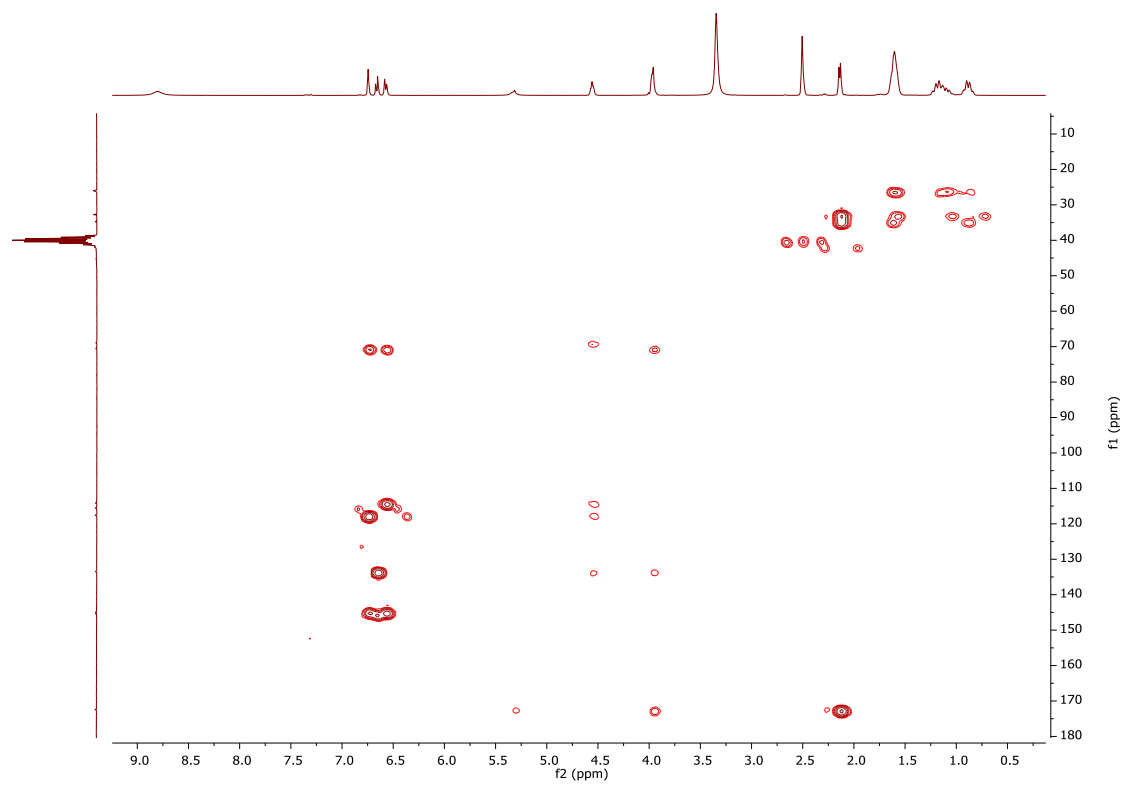

HMBC spectrum of **5e**



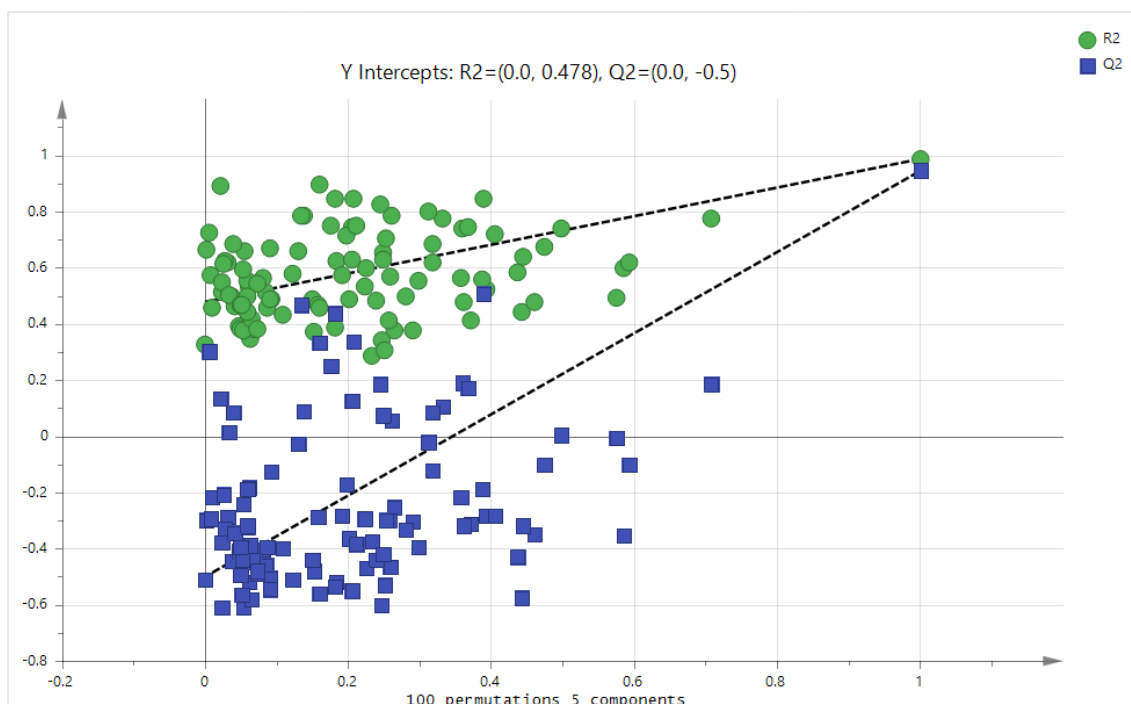

Figure S3: Permutation testing on the generated QSAR reduced model (n=100 permutations)

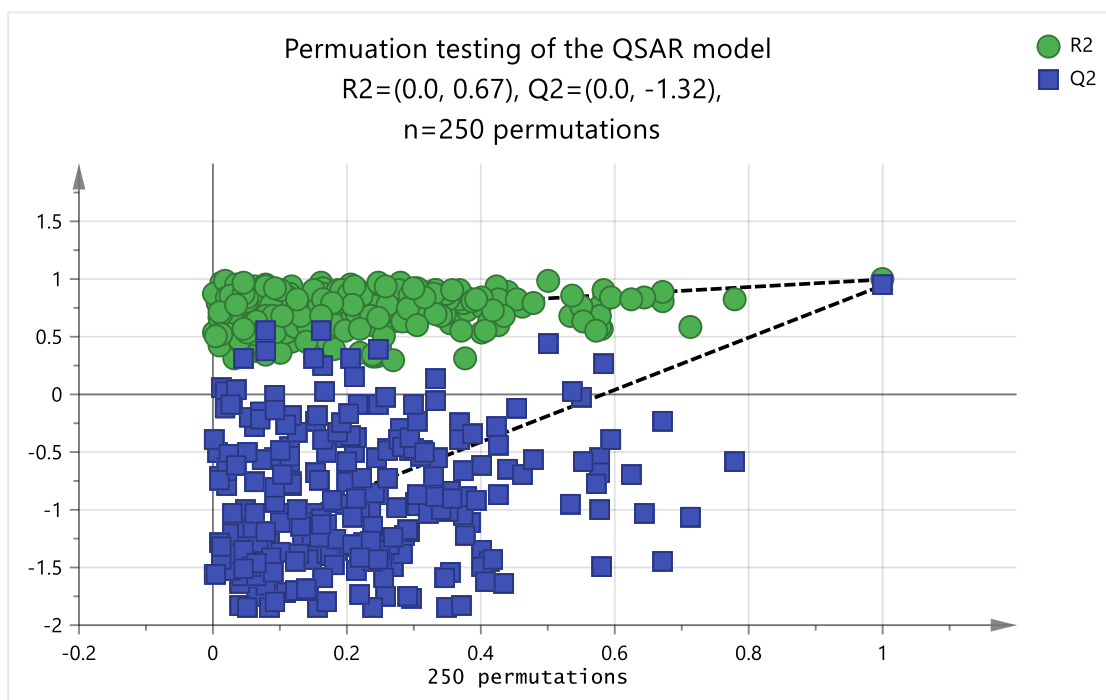

Figure S4: Permutation testing on the generated QSAR reduced model (n=250 permutations)

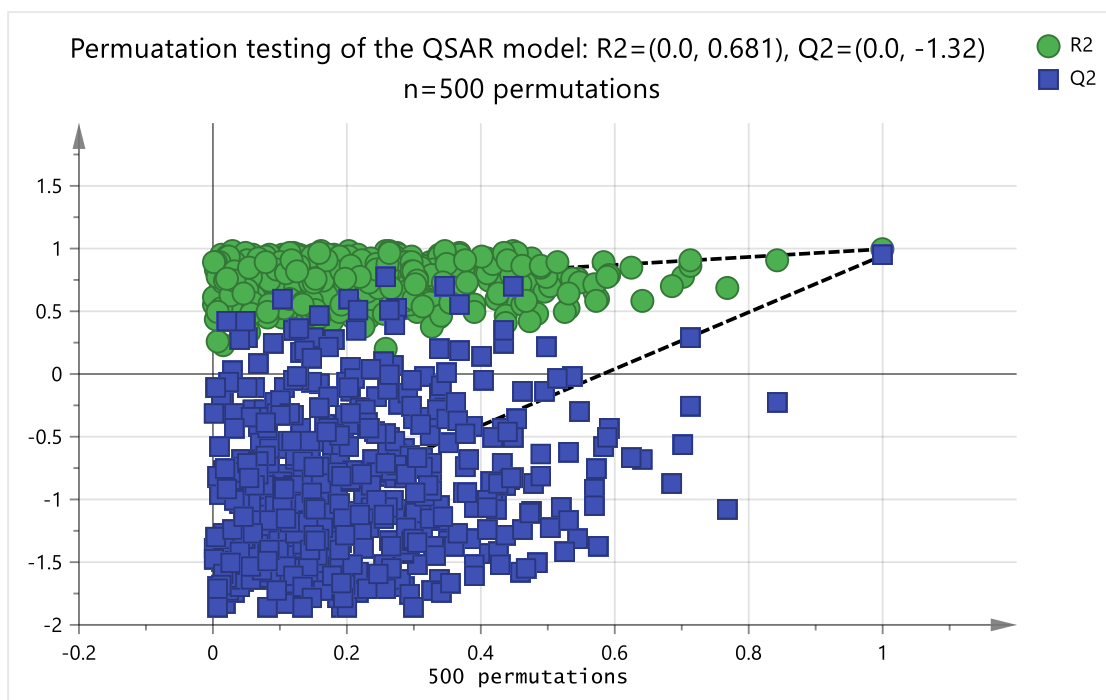

Figure S5: Permutation testing on the generated QSAR reduced model ( $n=500$  permutations)

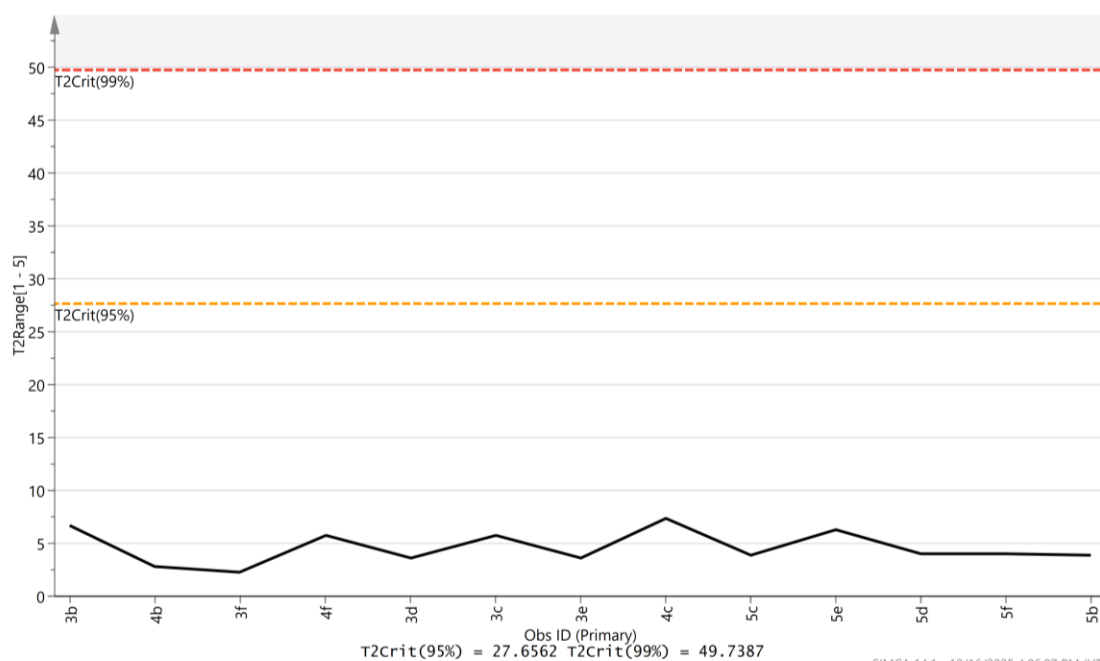

Figure S6: Validation of the QSAR model, T2 Hotelling testing for severe outliers of the reduced model

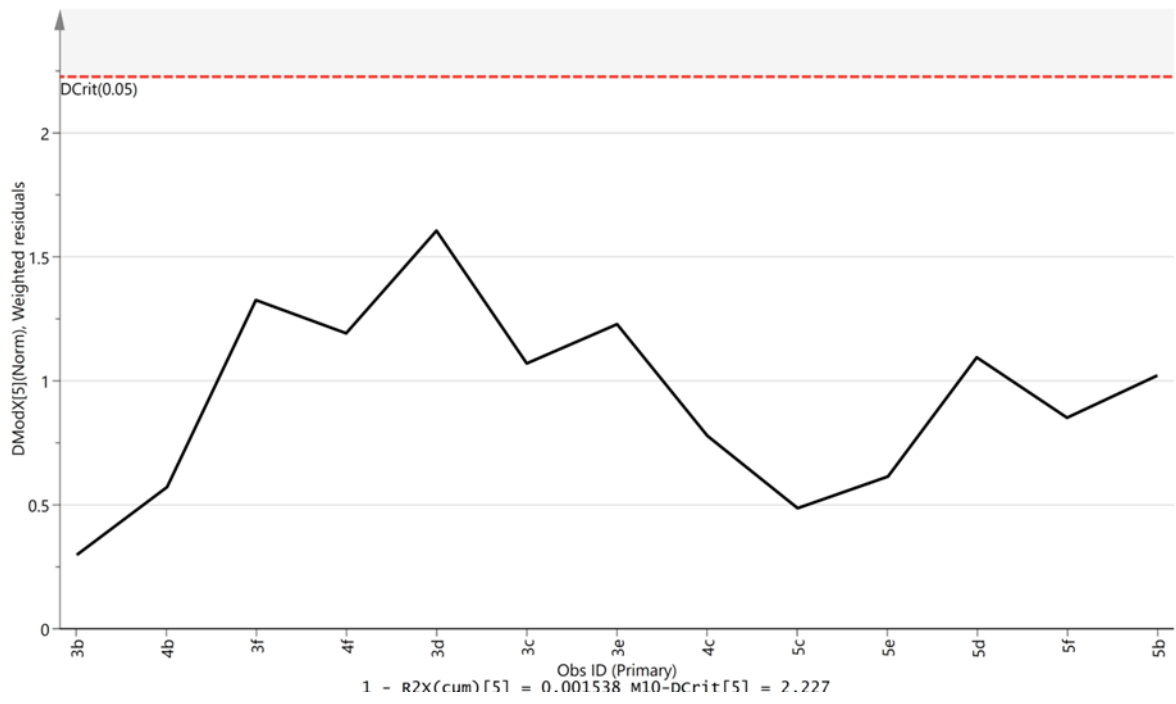

Figure S7: Validation of the QSAR reduced model DModX testing for mild outliers

## Tables

Table S1: Parameters used for the exploration of the non-covalent complexes between the A $\beta$  and the examined molecules

|                             |          |
|-----------------------------|----------|
| Capillary (kV)              | 3.5      |
| Source ( $^{\circ}$ C)      | 120      |
| L.M.                        | 4.7      |
| H.M.                        | 15.0     |
| Collision Energy (V)        | 5.0      |
| Sampling Cone (V)           | 2.0      |
| Desolvation ( $^{\circ}$ C) | 220      |
| Cell Entrance (V)           | 2.0      |
| Extraction Cone (V)         | 2.0      |
| Cone                        | Off      |
| Ion Energy (V)              | 0.5      |
| Cell Exit (V)               | -10      |
| Ion Guide: (V)              | 3.0      |
| Desolvation (L/hr)          | 400      |
| Pre Filter (V)              | 2.0      |
| Scan range (m/z)            | 150-2000 |
| Detector (V)                | 1900     |

Table S2: Cross validation testing

| Number of groups (k) | R <sup>2</sup> | Q <sup>2</sup> |
|----------------------|----------------|----------------|
| 2                    | 0.987          | 0.934          |
| 5                    | 0.987          | 0.925          |
| 7                    | 0.987          | 0.944          |
| 10                   | 0.987          | 0.922          |
| 16 (Leave one out)   | 0.996          | 0.935          |
